# Supplementary material
Source: PubMed Central journal article supplement (PMC6053949)
Supplement: blood820985-suppl1.pdf [file blood820985-suppl1.pdf]

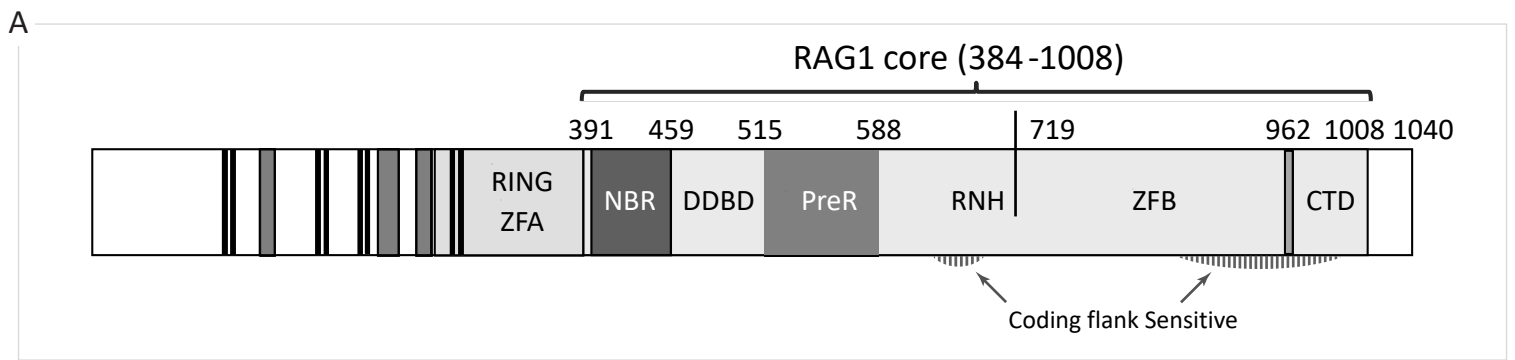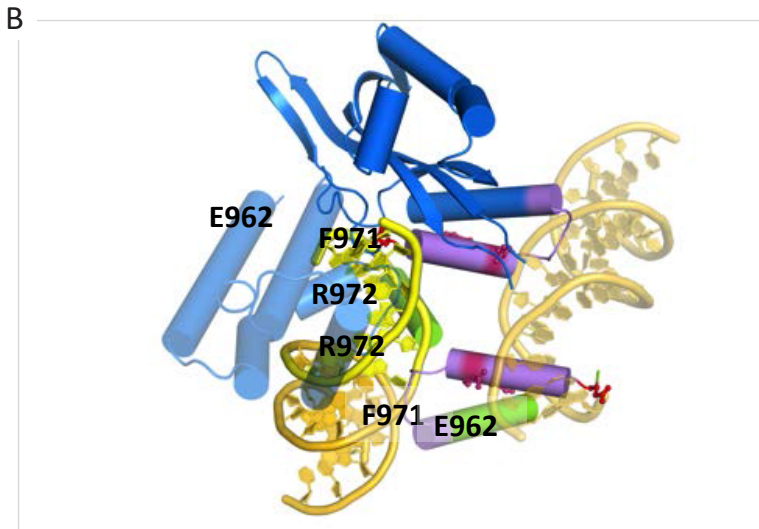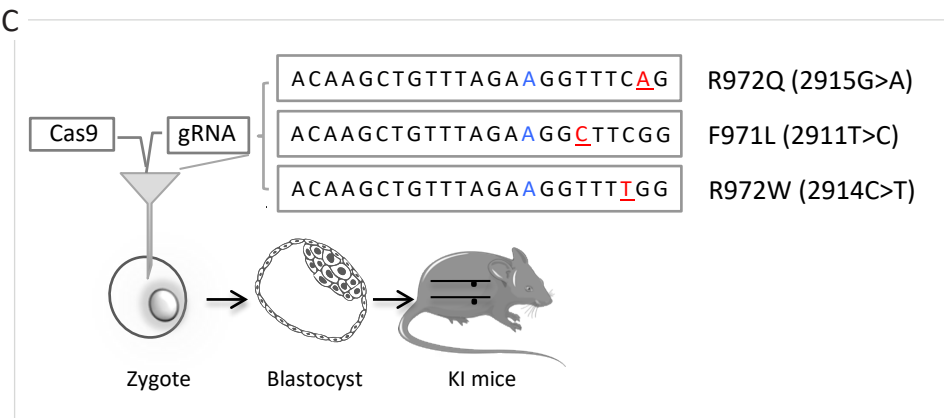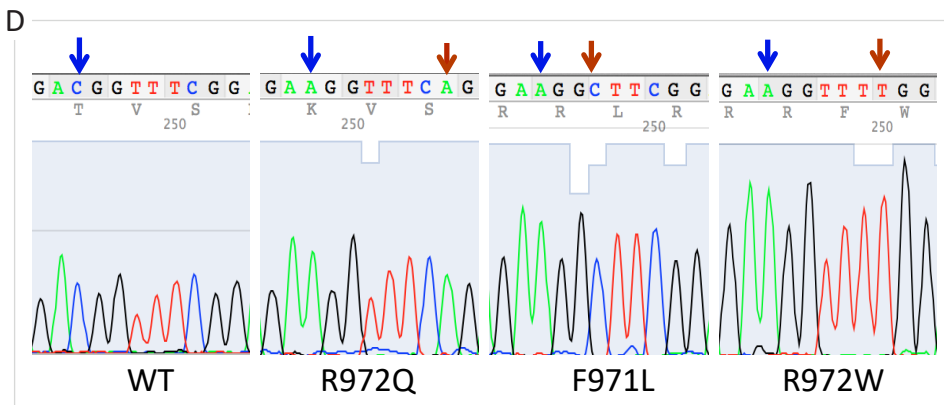

**Figure S1**

**Predicted effect of *Rag1* mutations based on crystallography data, and strategy for generation of *Rag1* mutant mice**

**A** RAG1 protein structure, showing Zinc Finger A (ZFA) and Zinc Finger B (ZFB), Nonamer binding region (NBR) and DNA dimerization and binding domain (DDBD), pre-RNase (preR), the catalytic RNase H-like (RNH) domain and the C-terminal domain (CTD). Residue numbers are given for the boundaries of the different domains. Two coding flank sensitive regions run from amino acid 606-611 and from 889-974.

**B** Structural model of RAG1-RSS complex. Both F971 and R972 are located on the bridging  $\alpha$ -helix (colored in purple), which is immediately downstream from the catalytic residue E962 and is predicted to link the two RSS DNAs.

**C** Zygote injection with a mixture of 3 different ssODNs each containing specific point mutations (red) and a common silent variant (blue).

**D** Sanger sequences of resulting genotypes showing the silent variant (blue arrow) and the specific c.2915G>A, c.2911T>C and  $\alpha$  c.2914C>T mutations (red arrows).

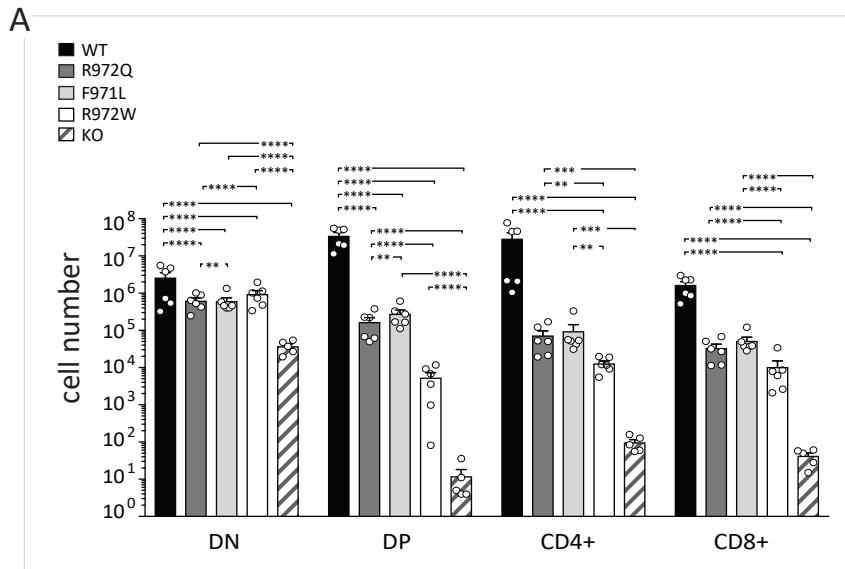

**Figure S2**

**Absolute number of cells at various stages of lymphocyte development in the thymus**

**A** Absolute count of CD4<sup>-</sup> CD8<sup>-</sup> double negative (DN), CD4<sup>+</sup> CD8<sup>+</sup> double positive (DP) and single positive (CD4<sup>+</sup> and CD8<sup>+</sup>) cells in the thymus of wild-type (WT), Rag1<sup>-/-</sup> (KO) and indicated mutant mice.

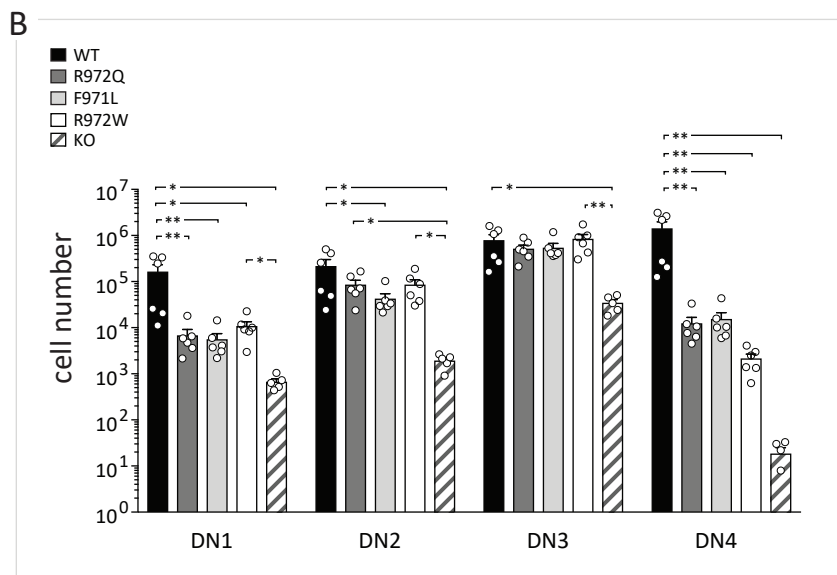

**B** Absolute count of DN thymocytes at various stages of development (DN1-DN4) based on CD44 and CD25 expression: CD44<sup>+</sup> CD25<sup>-</sup> (DN1), CD44<sup>+</sup> CD25<sup>+</sup> (DN2), CD44<sup>-</sup> CD25<sup>+</sup> (DN3), and CD44<sup>-</sup> CD25<sup>-</sup> (DN4).

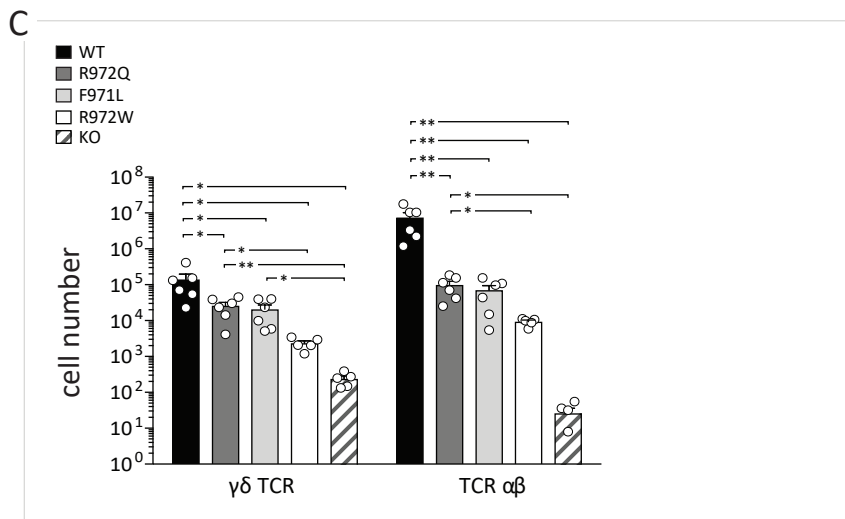

**C** Absolute count of  $\gamma\delta$ TCR and  $\alpha\beta$ TCR thymocytes.

In all panels, 6 mice per group were analyzed, and statistical analysis was done with one-way ANOVA (\*  $p \leq 0.05$ , \*\*  $p \leq 0.01$ , \*\*\*  $p \leq 0.001$ , \*\*\*\*  $p \leq 0.0001$ ).

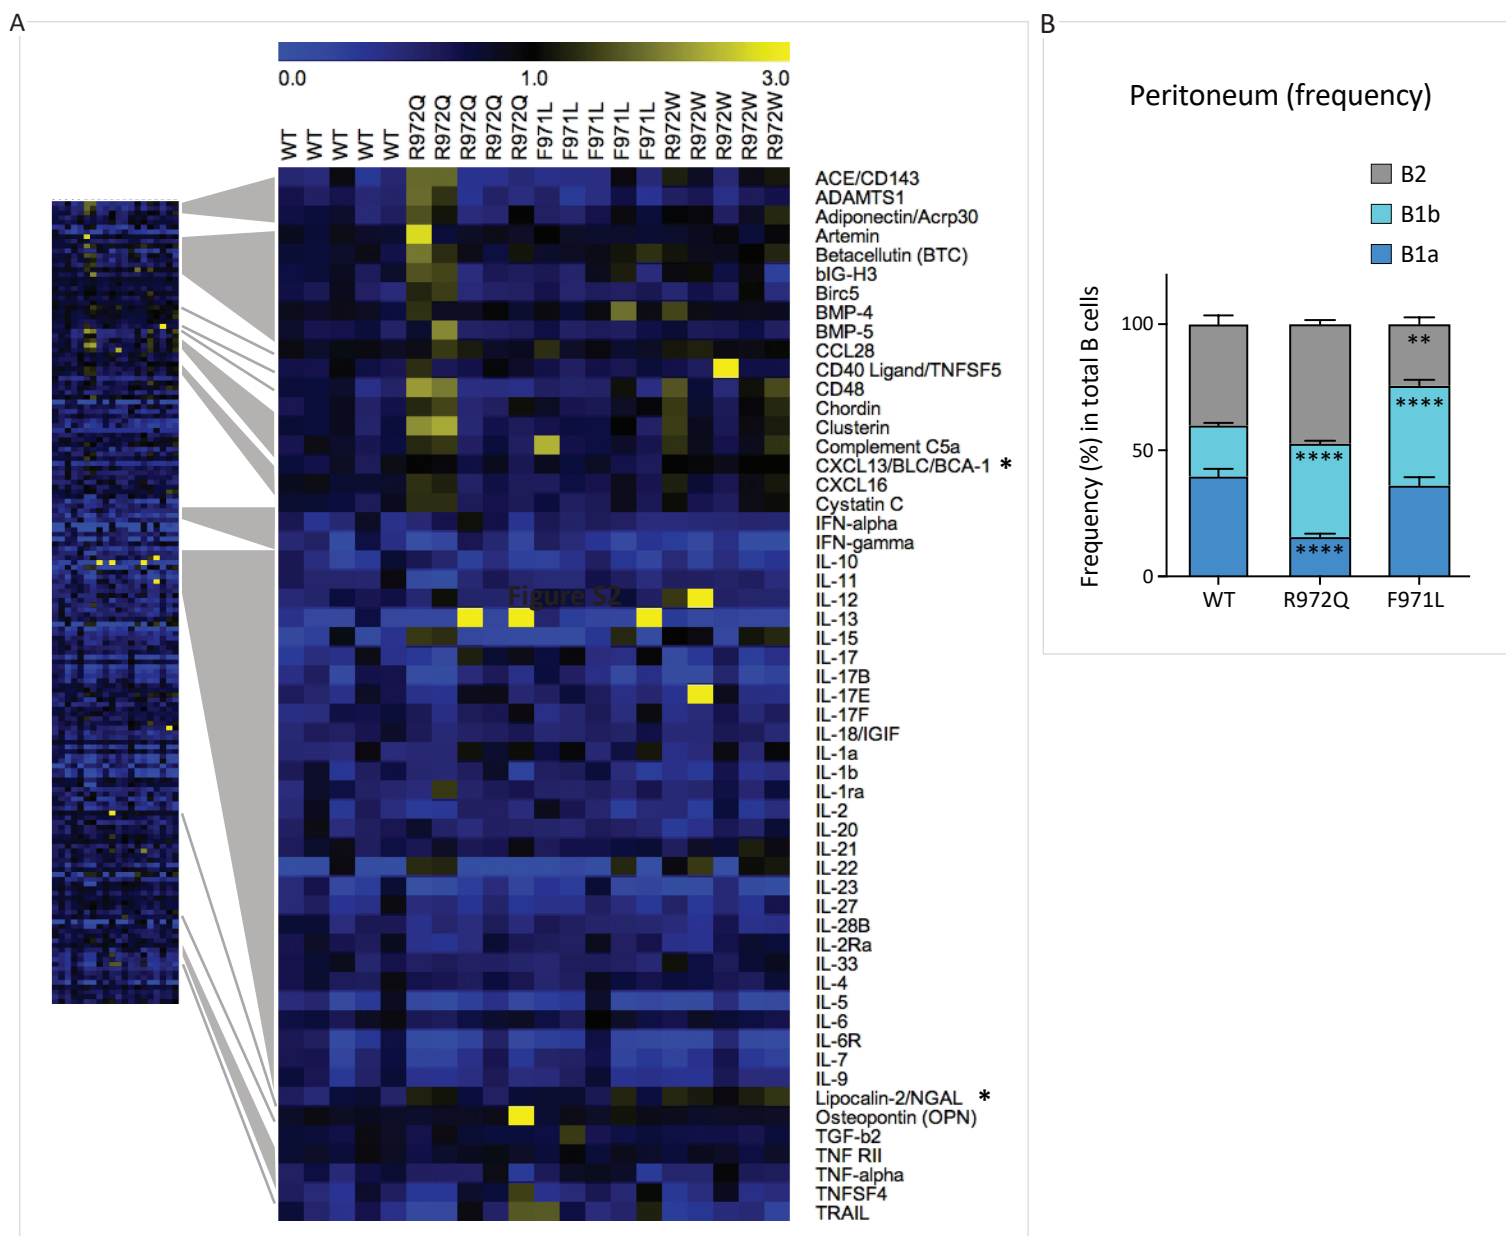

**Figure S3**

**Anti-cytokine antibodies and distribution of peritoneal B1 and B2 subsets**

**A** An array of full-length murine proteins was used to screen for cytokine autoantibodies (IgG) in mutant (n=5 per strain) and WT (n=5) mice. The heatmap displays the ratio of signal intensities to the second SD over the WT mean, and therefore highlights signals that are stronger in the mutant mice. A selection of cytokines, for which autoantibodies had been found in patients previously, or that tested positive in our mice, are shown on the right. SEM test was used to test for statistical significance between groups (\* FDR  $\leq$  1%). This was only the case for Lipocalin-2/NGAL and CXCL13/BCL/BCA-1 in the R972W model compared to WT.

**B** Distribution of B1 (CD19<sup>+</sup> CD11b<sup>+</sup>) and B2 (CD19<sup>+</sup> CD11b<sup>-</sup>) cells and B1a (CD19<sup>+</sup> CD11b<sup>+</sup> CD5<sup>+</sup>) and B1b (CD19<sup>+</sup> CD11b<sup>+</sup> CD5<sup>-</sup>) cells in peritoneal lavage. Statistical analysis was done with one-way ANOVA (\*\* p  $\leq$  0.01, \*\*\* p  $\leq$  0.001, \*\*\*\* p  $\leq$  0.0001). Error bars represent SEM.

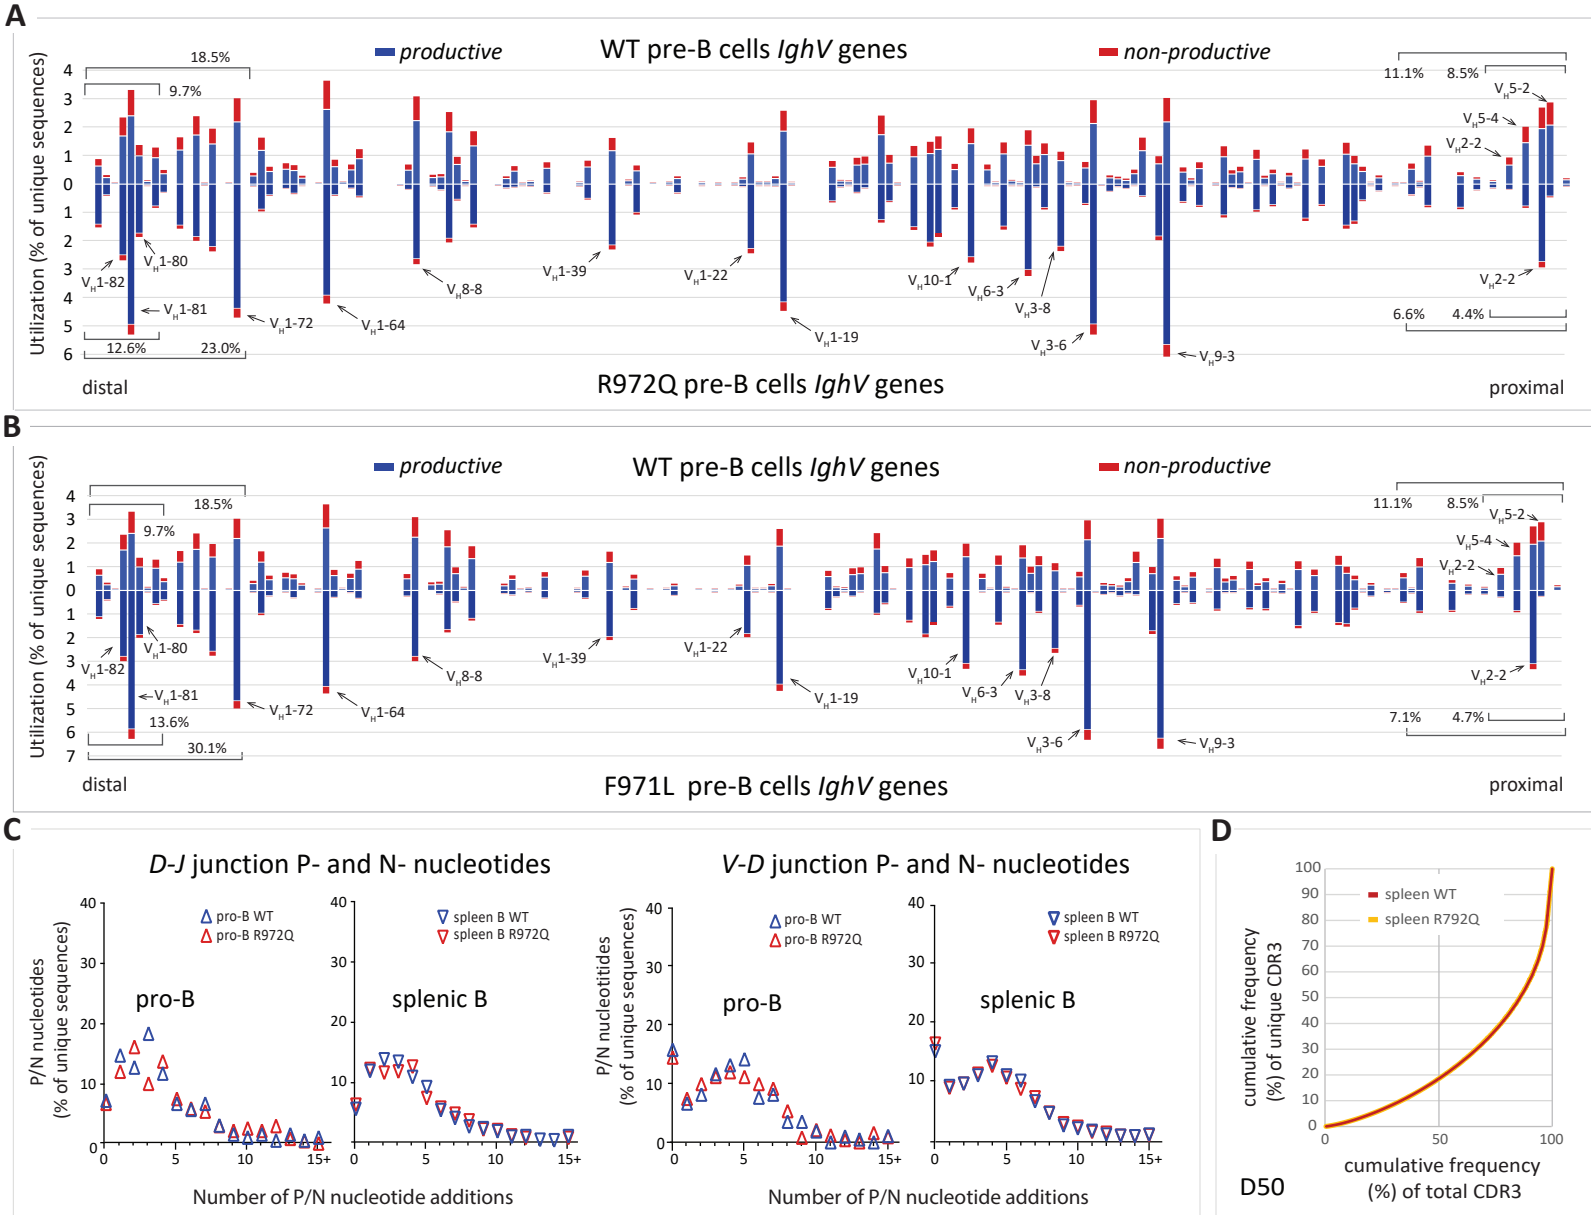

**Figure S4**

***Igh* repertoire of bone marrow and splenic B cells**

- A** V gene usage in pre-B cells from WT (top, n=3), and R972Q (bottom, n=3) mice.
- B** V gene usage in pre-B cells from WT (top, n=3) and F971L (bottom, n=3) mice.
- C** Distribution of P and N nucleotide addition in *D-J* and *V-D* junctions in bone marrow pro-B cells and splenic B cells. X-axis: number of P/N nucleotide additions, Y-axis: percentage of unique sequences with given number of P/N nucleotide additions.
- D** D50, corresponding to the percentage of unique CDR3 sequences that account for 50% of the total number of sequences recovered of mature splenic B cells from R972Q vs WT mice.

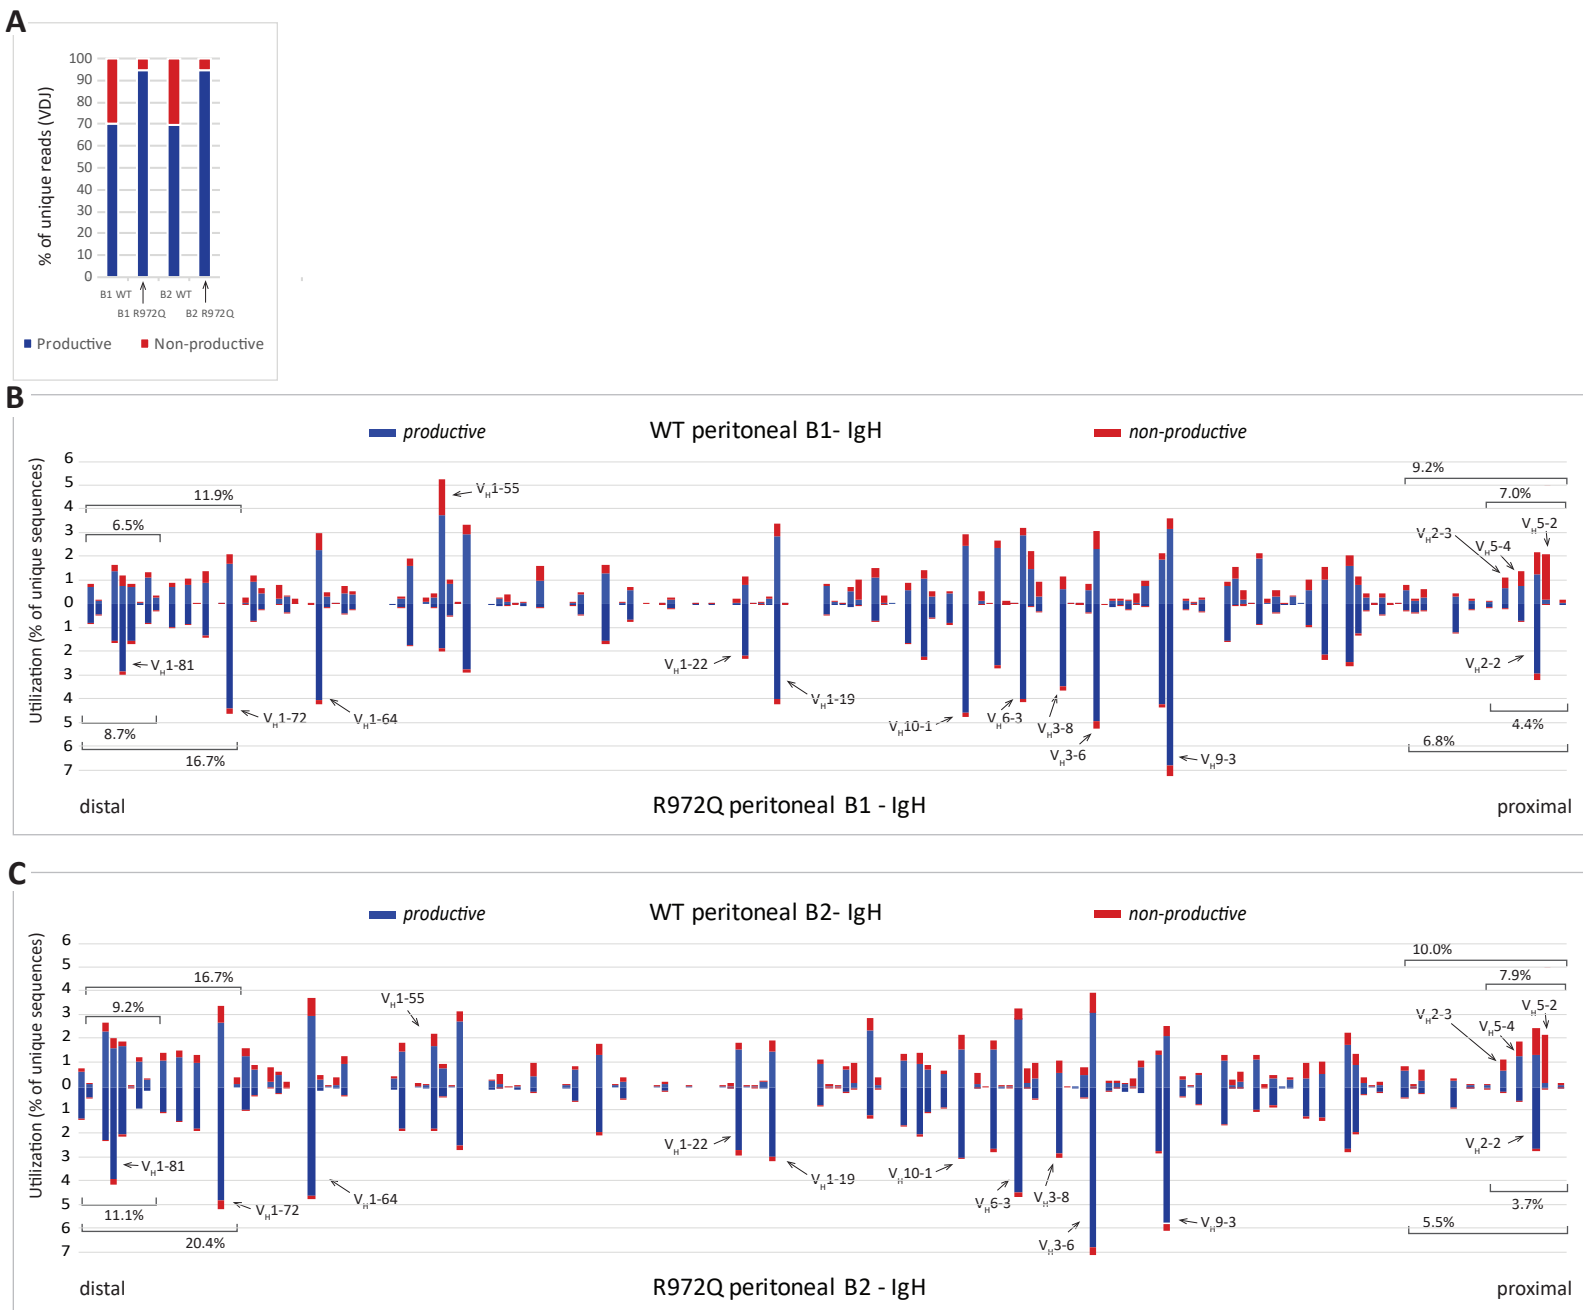

**Figure S5**

***Igh* repertoire of peritoneal B1 and B2 cells**

**A** Bar graph showing proportion of productive (blue) and non-productive (red) reads among total unique *Igh* VDJ rearrangements in FACS-sorted peritoneal B1 (B220<sup>+</sup> CD19<sup>+</sup> IgM<sup>+</sup> CD11<sup>+</sup>) and B2 (B220<sup>+</sup> CD19<sup>+</sup> IgM<sup>+</sup> CD11b<sup>-</sup>) cells.

**B** Frequency of V gene utilization in unique *Igh* VDJ rearrangements in peritoneal B1 (B220<sup>+</sup> CD19<sup>+</sup> IgM<sup>+</sup> CD11b<sup>+</sup>) cells from WT (top) and R972Q (bottom) mice.

**C** Frequency of V gene utilization in unique *Igh* VDJ rearrangements in peritoneal B2 (B220<sup>+</sup> CD19<sup>+</sup> IgM<sup>+</sup> CD11b<sup>-</sup>) cells from WT (top) and R972Q (bottom) mice.

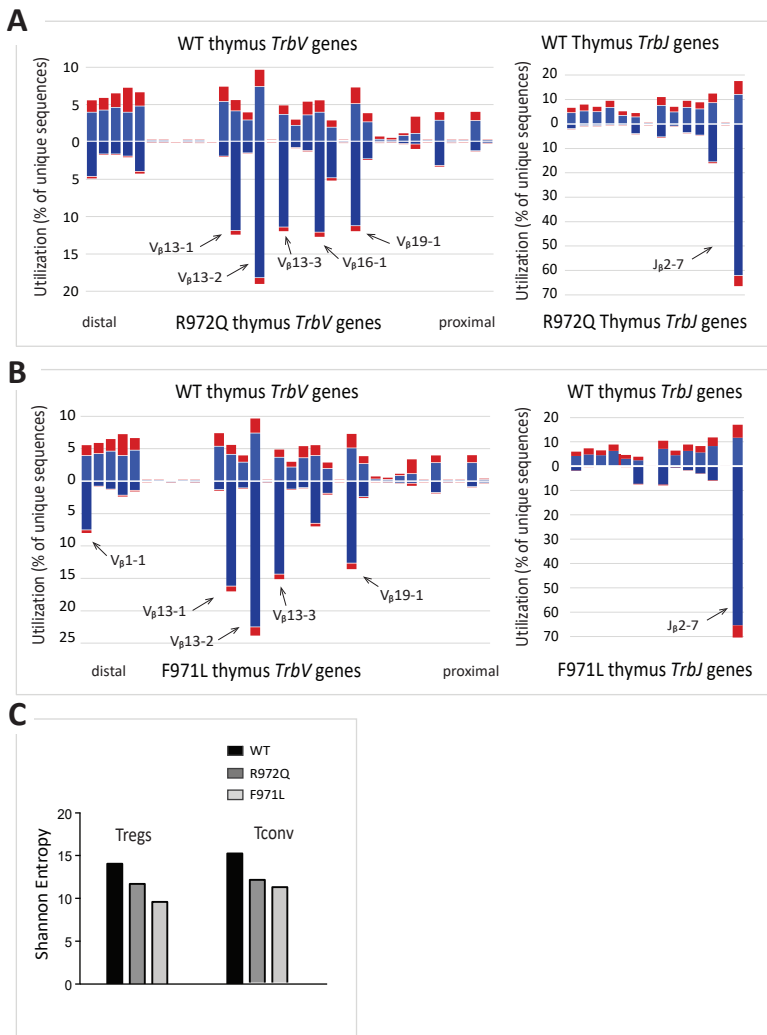

**Figure S6**

**Thymocyte *Trb* repertoire**

**A** Utilization of *V* (left) and *J* (right) genes in *Trb* VDJ rearrangements in unsorted thymocytes from WT (top, n=3) and R972Q (bottom, n=3) mice.

**B** Utilization of *V* (left) and *J* (right) genes in *Trb* VDJ rearrangements in unsorted thymocytes from WT (top, n=3) and F971L (bottom, n=3) mice.

**C** Shannon Entropy as a measure of diversity of the *Trb* repertoire of Treg and Tconv cells.

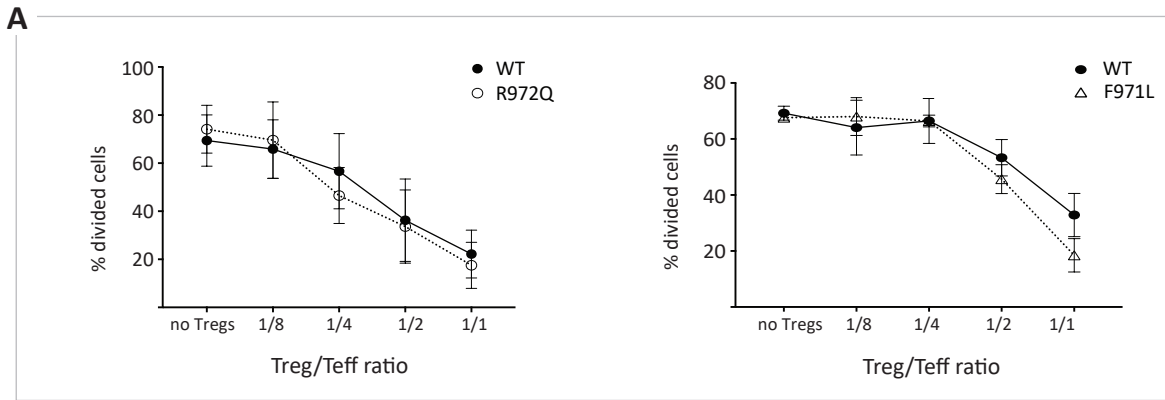

**Figure S7**

**Treg suppressive function**

**A** Treg suppression assay comparing Treg cells of WT mice, R972Q and F971L mice.

Data points represent means and SEM of 2 independent experiments.

Table S1: Genotypes of generated F0 mice (related to figure S1)

|                 | Allele 1     | Allele 2                |
|-----------------|--------------|-------------------------|
| 1               | c. 2911T>C   | 6bp indel               |
| 2*              | c. 2911T>C   | c. 2911T>C              |
| 3 <sup>1</sup>  | c. 2911T>C   | c. 2911T>C              |
| 4 <sup>2</sup>  | c. 2911T>C   | c. 2911T>C              |
| 5 <sup>3</sup>  | c. 2914C>T   | c. 2911T>C              |
| 6               | c. 2911T>C   | c. 2911T>C              |
| 7               | c. 2911T>C   | 2bp indel               |
| 8*              | c. 2915G>A   | c. 2915G>A              |
| 9 <sup>4</sup>  | c. 2915G>A   | c. 2914C>T              |
| 10              | c. 2915G>A   | c. 2914C>T              |
| 11              | c. 2911T>C   | 6bp indel               |
| 12              | 1bp deletion | c. 2914C>T              |
| 13              | c. 2914C>T   | 156bp indel             |
| 14              | c. 2911T>C   | c. 2911T>C              |
| 15              | c. 2911T>C   | c. 2911T>C              |
| 16*             | c. 2914C>T   | c. 2914C>T              |
| 17*             | c. 2915G>A   | c. 2908C>A (silent mut) |
| 18              | c. 2915G>A   | c. 2914C>T              |
| 19*             | c. 2911T>C   | c. 2914C>T              |
| 20 <sup>5</sup> | c. 2911T>C   | c. 2915G>A              |
| 21              | c. 2914C>T   | 9bp deletion            |
| 22              | c. 2914C>T   | c. 2914C>T              |
| 23              | c. 2911T>C   | c. 2911T>C              |
| 24              | c. 2911T>C   | c. 2911T>C              |
| 25              | WT           | 4bp deletion            |
| 26              | c. 2911T>C   | c. 2915G>A              |

<sup>1</sup> 17bp indel on one allele

<sup>2</sup> 1bp indel on one allele

<sup>3</sup> Additional third sequence with c. 2915G>A due to somatic chimerism

<sup>4</sup> 9 bp indel on one allele

<sup>5</sup> 1bp indel on one allele

\* F0 mice that were selected to continue breeding with to generate 2 lines per mutation



Table S2: Repertoire sequencing counts (related to figure 6 and 7 and figure S4 and S5)

| Sample           | Total (VDJ) | Unique (VDJ) | Unique productive (VDJ) | HTGTS total VDJ sequences (used for VDJ/DJ ratio) | HTGTS DJ sequences (used for D graph) |
|------------------|-------------|--------------|-------------------------|---------------------------------------------------|---------------------------------------|
| pro-B WT         | 4439        | 3149         | 1729                    | 8178                                              | 9448                                  |
| pro-B R972Q (2)  | 1543        | 610          | 431                     | 1031+1852                                         | 1884+4048                             |
| Pro-B F971L (2)  | 482         | 112          | 67                      | 286+747                                           | 1280+4043                             |
| Spleen WT        | 129721      | 15617        | 10674                   |                                                   |                                       |
| Spleen R972Q (2) | 87132       | 10967        | 10170                   |                                                   |                                       |
| pre-B WT (3)     | 317993      | 171193       | 124139                  |                                                   |                                       |
| pre-B R972Q (3)  | 187524      | 56416        | 52571                   |                                                   |                                       |
| Pre-B F971L (3)  | 20208       | 11030        | 10309                   |                                                   |                                       |
| Thymus WT (3)    | 1505542     | 932332       | 768007                  |                                                   |                                       |
| Thymus R972Q (3) | 559557      | 94890        | 89866                   |                                                   |                                       |
| Thymus F971L (3) | 53583       | 4870         | 4152                    |                                                   |                                       |
| DN4 WT           | 84084       | 56679        | 35104                   |                                                   |                                       |
| DN4 R972Q        | 199         | 128          | 95                      |                                                   |                                       |
| DP WT            | 1459836     | 1144368      | 795466                  |                                                   |                                       |
| DP R972Q         | 515080      | 74453        | 70049                   |                                                   |                                       |
| DP F971L (2)     | 74457       | 17501        | 16450                   |                                                   |                                       |
| WT T conv        | 80705       | 65569        | 45410                   |                                                   |                                       |
| WT Treg          | 44015       | 33666        | 22600                   |                                                   |                                       |
| R972Q Tconv      | 63692       | 17664        | 16797                   |                                                   |                                       |
| R972Q Treg       | 21781       | 7954         | 7502                    |                                                   |                                       |
| F971L Tconv      | 37247       | 8820         | 8294                    |                                                   |                                       |
| F971L Treg       | 10363       | 2486         | 2276                    |                                                   |                                       |

Table S3: Comparison of gene distributions of WT vs. mutant, using Kolmogorov-Smirnov

| Gene | Cell                | WT vs. | P value   |
|------|---------------------|--------|-----------|
| V    | pro-B cells         | R972Q  | 1.922E-12 |
| V    | pro-B cells         | F971L  | 4.270E-22 |
| V    | pre-B cells         | R972Q  | 4.400E-02 |
| V    | pre-B cells         | F971L  | 8.360E-07 |
| V    | spleen B cells      | R972Q  | 1.980E-03 |
| V    | peritoneal B1 cells | R972Q  | 3.300E-02 |
| V    | peritoneal B2 cells | R972Q  | 2.400E-02 |
| V    | DN4 thymocytes      | R972Q  | 3.340E-08 |
| J    | DN4 thymocytes      | R972Q  | 1.870E-05 |
| V    | DP thymocytes       | R972Q  | 1.584E-05 |
| V    | DP thymocytes       | F971L  | 8.800E-07 |
| J    | DP thymocytes       | R972Q  | 1.189E-04 |
| J    | DP thymocytes       | F971L  | 1.870E-05 |
| V    | unsorted thymocytes | R972Q  | 2.270E-05 |
| V    | unsorted thymocytes | F971L  | 2.270E-05 |
| J    | unsorted thymocytes | R972Q  | 1.189E-04 |
| J    | unsorted thymocytes | F971L  | 1.870E-05 |
| V    | CD4+ Tconv          | R972Q  | 9.680E-03 |
| V    | CD4+ Tconv          | F971L  | 1.655E-03 |
| J    | CD4+ Tconv          | R972Q  | 6.434E-04 |
| J    | CD4+ Tconv          | F971L  | 1.189E-04 |
| V    | CD4+ Treg           | R972Q  | 9.680E-03 |
| V    | CD4+ Treg           | F971L  | 7.290E-05 |
| J    | CD4+ Treg           | R972Q  | 6.434E+04 |
| J    | CD4+ Treg           | F971L  | 1.189E-04 |

Table S4: Igh V genes in pro-B and splenic B cells (related to figure 6)

| V genes           | pro-B unique |       |                | F791L | p <sup>1</sup> | spleen unique |       |                |
|-------------------|--------------|-------|----------------|-------|----------------|---------------|-------|----------------|
|                   | WT           | R972Q | p <sup>1</sup> |       |                | WT            | R972Q | p <sup>1</sup> |
| <i>Ighv1-86</i>   | 0.03%        | 0.16% |                | 0.00% |                | 0.01%         | 0.00% |                |
| <i>Ighv1-85</i>   | 0.32%        | 0.66% |                | 0.89% |                | 0.79%         | 1.38% | ****           |
| <i>Ighv1-84</i>   | 0.25%        | 0.16% |                | 0.00% |                | 0.34%         | 0.42% |                |
| <i>Ighv1-83</i>   | 0.16%        | 0.00% |                | 0.00% |                | 0.08%         | 0.01% | *              |
| <i>Ighv1-82</i>   | 1.87%        | 1.97% |                | 2.68% |                | 3.28%         | 2.80% | *              |
| <i>Ighv1-81</i>   | 2.41%        | 3.11% |                | 2.68% |                | 2.86%         | 4.40% | ****           |
| <i>Ighv1-80</i>   | 0.89%        | 1.64% |                | 4.46% |                | 2.15%         | 2.22% |                |
| <i>Ighv1-79</i>   | 0.16%        | 0.00% |                | 0.00% |                | 0.11%         | 0.00% | ***            |
| <i>Ighv1-78</i>   | 1.02%        | 0.66% |                | 0.89% |                | 0.90%         | 0.78% |                |
| <i>Ighv1-77</i>   | 0.29%        | 0.00% |                | 0.00% |                | 0.39%         | 0.28% |                |
| <i>Ighv8-16</i>   | 0.00%        | 0.00% |                | 0.00% |                | 0.00%         | 0.00% |                |
| <i>Ighv1-76</i>   | 1.30%        | 1.15% |                | 0.00% |                | 1.28%         | 1.31% |                |
| <i>Ighv8-15</i>   | 0.00%        | 0.00% |                | 0.00% |                | 0.00%         | 0.00% |                |
| <i>Ighv1-75</i>   | 1.62%        | 1.15% |                | 0.89% |                | 1.25%         | 1.43% |                |
| <i>Ighv8-14</i>   | 0.00%        | 0.00% |                | 0.00% |                | 0.00%         | 0.00% |                |
| <i>Ighv1-74</i>   | 0.95%        | 1.15% |                | 0.89% |                | 1.17%         | 1.73% | ***            |
| <i>Ighv1-73</i>   | 0.03%        | 0.00% |                | 0.00% |                | 0.06%         | 0.00% |                |
| <i>Ighv8-13</i>   | 0.00%        | 0.00% |                | 0.00% |                | 0.00%         | 0.00% |                |
| <i>Ighv1-72</i>   | 2.06%        | 4.26% | *              | 1.79% |                | 2.44%         | 3.72% | ****           |
| <i>Ighv1-71</i>   | 0.00%        | 0.00% |                | 0.00% |                | 0.00%         | 0.00% |                |
| <i>Ighv1-70</i>   | 0.51%        | 0.16% |                | 1.79% |                | 0.21%         | 0.00% | ****           |
| <i>Ighv8-12</i>   | 1.17%        | 0.49% |                | 0.89% |                | 1.09%         | 0.80% | *              |
| <i>Ighv1-69</i>   | 0.83%        | 0.82% |                | 0.89% |                | 1.96%         | 0.89% | ****           |
| <i>Ighv1-68</i>   | 0.00%        | 0.00% |                | 0.00% |                | 0.00%         | 0.00% |                |
| <i>Ighv1-67</i>   | 0.98%        | 0.82% |                | 0.89% |                | 0.63%         | 0.01% | ****           |
| <i>Ighv1-66</i>   | 0.41%        | 0.16% |                | 0.00% |                | 0.54%         | 0.31% | *              |
| <i>Ighv8-11</i>   | 0.25%        | 0.33% |                | 0.89% |                | 0.14%         | 0.01% | ***            |
| <i>Ighv1-65</i>   | 0.00%        | 0.00% |                | 0.00% |                | 0.00%         | 0.00% |                |
| <i>Ighv8-10</i>   | 0.00%        | 0.00% |                | 0.00% |                | 0.00%         | 0.00% |                |
| <i>Ighv1-64</i>   | 2.54%        | 1.80% |                | 2.68% |                | 3.49%         | 4.17% | *              |
| <i>Ighv1-63</i>   | 0.57%        | 0.33% |                | 0.00% |                | 0.47%         | 0.14% | ****           |
| <i>Ighv8-9</i>    | 0.03%        | 0.00% |                | 0.00% |                | 0.04%         | 0.00% |                |
| <i>Ighv1-62-3</i> | 0.57%        | 0.33% |                | 0.00% |                | 0.60%         | 0.28% | ***            |
| <i>Ighv1-62-2</i> | 0.00%        | 0.00% |                | 0.00% |                | 0.00%         | 0.00% |                |
| <i>Ighv1-62-1</i> | 0.00%        | 0.00% |                | 0.00% |                | 0.00%         | 0.00% |                |
| <i>Ighv1-62</i>   | 0.06%        | 0.00% |                | 0.00% |                | 0.07%         | 0.01% | *              |
| <i>Ighv1-61</i>   | 0.19%        | 0.16% |                | 0.00% |                | 0.65%         | 0.19% | ****           |
| <i>Ighv1-60</i>   | 0.00%        | 0.00% |                | 0.00% |                | 0.00%         | 0.00% |                |
| <i>Ighv1-59</i>   | 0.60%        | 0.82% |                | 0.00% |                | 0.79%         | 0.41% | ***            |
| <i>Ighv1-58</i>   | 0.41%        | 0.16% |                | 0.00% |                | 0.49%         | 0.16% | ****           |

<sup>1</sup>P value calculated with Chi square test. \* P≤0.05, \*\* P≤0.01, \*\*\* P≤0.001, \*\*\*\* P≤0.0001

Table S4 continued ...

| V genes         | pro-B unique |       |  | F791L | p <sup>1</sup> | spleen unique |       |                |
|-----------------|--------------|-------|--|-------|----------------|---------------|-------|----------------|
|                 | WT           | R972Q |  |       |                | WT            | R972Q | p <sup>1</sup> |
| <i>Ighv8-8</i>  | 1.43%        | 2.46% |  | 1.79% |                | 1.76%         | 1.87% |                |
| <i>Ighv1-57</i> | 0.00%        | 0.00% |  | 0.00% |                | 0.00%         | 0.00% |                |
| <i>Ighv8-7</i>  | 0.51%        | 0.16% |  | 0.89% |                | 0.22%         | 0.01% | ****           |
| <i>Ighv1-56</i> | 0.10%        | 0.00% |  | 0.00% |                | 0.10%         | 0.05% |                |
| <i>Ighv1-55</i> | 2.92%        | 1.97% |  | 0.89% |                | 2.88%         | 2.39% | *              |
| <i>Ighv1-54</i> | 0.60%        | 0.82% |  | 0.89% |                | 0.71%         | 0.44% | *              |
| <i>Ighv8-6</i>  | 0.00%        | 0.00% |  | 0.00% |                | 0.06%         | 0.00% | *              |
| <i>Ighv1-53</i> | 1.68%        | 1.15% |  | 0.00% |                | 2.43%         | 2.18% |                |
| <i>Ighv1-52</i> | 0.35%        | 0.49% |  | 0.00% |                | 1.04%         | 0.56% | ****           |
| <i>Ighv1-51</i> | 0.00%        | 0.16% |  | 0.00% |                | 0.00%         | 0.00% |                |
| <i>Ighv1-50</i> | 0.64%        | 0.66% |  | 0.89% |                | 1.14%         | 1.09% |                |
| <i>Ighv8-5</i>  | 0.22%        | 0.16% |  | 0.00% |                | 0.17%         | 0.03% | ***            |
| <i>Ighv1-49</i> | 0.51%        | 0.33% |  | 0.00% |                | 0.33%         | 0.04% | ****           |
| <i>Ighv1-48</i> | 0.00%        | 0.00% |  | 0.00% |                | 0.01%         | 0.00% |                |
| <i>Ighv8-4</i>  | 0.10%        | 0.00% |  | 0.00% |                | 0.06%         | 0.00% | *              |
| <i>Ighv8-3</i>  | 0.00%        | 0.00% |  | 0.00% |                | 0.00%         | 0.00% |                |
| <i>Ighv1-47</i> | 0.92%        | 0.33% |  | 0.00% |                | 0.56%         | 0.16% | ****           |
| <i>Ighv1-46</i> | 0.03%        | 0.00% |  | 0.00% |                | 0.00%         | 0.00% |                |
| <i>Ighv1-45</i> | 0.00%        | 0.00% |  | 0.00% |                | 0.00%         | 0.00% |                |
| <i>Ighv1-44</i> | 0.00%        | 0.00% |  | 0.00% |                | 0.00%         | 0.00% |                |
| <i>Ighv1-43</i> | 0.00%        | 0.00% |  | 0.00% |                | 0.04%         | 0.01% |                |
| <i>Ighv1-42</i> | 0.64%        | 0.33% |  | 0.00% |                | 0.81%         | 0.62% |                |
| <i>Ighv1-41</i> | 0.00%        | 0.00% |  | 0.00% |                | 0.00%         | 0.00% |                |
| <i>Ighv1-40</i> | 0.06%        | 0.00% |  | 0.00% |                | 0.02%         | 0.00% |                |
| <i>Ighv1-39</i> | 1.17%        | 1.64% |  | 1.79% |                | 1.82%         | 2.09% |                |
| <i>Ighv1-38</i> | 0.32%        | 0.16% |  | 0.00% |                | 0.13%         | 0.00% | ***            |
| <i>Ighv1-37</i> | 0.06%        | 0.00% |  | 0.00% |                | 0.09%         | 0.00% | *              |
| <i>Ighv1-36</i> | 0.44%        | 0.66% |  | 1.79% |                | 0.47%         | 0.46% |                |
| <i>Ighv1-35</i> | 0.00%        | 0.00% |  | 0.00% |                | 0.00%         | 0.00% |                |
| <i>Ighv1-34</i> | 0.13%        | 0.33% |  | 0.00% |                | 0.21%         | 0.47% | ***            |
| <i>Ighv1-33</i> | 0.13%        | 0.16% |  | 0.89% |                | 0.38%         | 0.16% | *              |
| <i>Ighv1-32</i> | 0.06%        | 0.00% |  | 0.00% |                | 0.05%         | 0.00% |                |
| <i>Ighv1-31</i> | 0.19%        | 0.16% |  | 0.00% |                | 0.18%         | 0.20% |                |
| <i>Ighv1-30</i> | 0.00%        | 0.00% |  | 0.00% |                | 0.00%         | 0.00% |                |
| <i>Ighv1-29</i> | 0.00%        | 0.00% |  | 0.00% |                | 0.00%         | 0.00% |                |
| <i>Ighv1-28</i> | 0.03%        | 0.00% |  | 0.00% |                | 0.04%         | 0.00% |                |
| <i>Ighv1-27</i> | 0.00%        | 0.00% |  | 0.00% |                | 0.00%         | 0.00% |                |
| <i>Ighv1-26</i> | 3.49%        | 4.75% |  | 0.89% |                | 5.48%         | 6.23% | *              |
| <i>Ighv1-25</i> | 0.10%        | 0.33% |  | 0.00% |                | 0.06%         | 0.00% | *              |
| <i>Ighv1-24</i> | 0.00%        | 0.00% |  | 0.00% |                | 0.00%         | 0.00% |                |
| <i>Ighv1-23</i> | 0.41%        | 0.00% |  | 0.00% |                | 0.32%         | 0.00% | ****           |
| <i>Ighv1-22</i> | 0.95%        | 0.82% |  | 2.68% |                | 1.68%         | 2.59% | ****           |
| <i>Ighv1-21</i> | 0.00%        | 0.16% |  | 0.00% |                | 0.02%         | 0.00% |                |

Table S4 continued ...

| V genes           | pro-B unique |       |                | F791L | p <sup>1</sup> | spleen unique |       |                |
|-------------------|--------------|-------|----------------|-------|----------------|---------------|-------|----------------|
|                   | WT           | R972Q | p <sup>1</sup> |       |                | WT            | R972Q | p <sup>1</sup> |
| <i>Ighv1-21-1</i> | 0.10%        | 0.00% |                | 0.00% |                | 0.05%         | 0.00% |                |
| <i>Ighv1-20</i>   | 0.19%        | 0.00% |                | 0.00% |                | 0.15%         | 0.03% | *              |
| <i>Ighv1-19</i>   | 2.03%        | 4.26% | *              | 3.57% |                | 1.52%         | 3.15% | ****           |
| <i>Ighv1-19-1</i> | 0.06%        | 0.00% |                | 0.00% |                | 0.02%         | 0.00% |                |
| <i>Ighv1-18</i>   | 2.41%        | 2.46% |                | 6.25% |                | 2.71%         | 3.33% | *              |
| <i>Ighv1-17</i>   | 0.00%        | 0.00% |                | 0.00% |                | 0.00%         | 0.00% |                |
| <i>Ighv1-17-1</i> | 0.00%        | 0.00% |                | 0.00% |                | 0.00%         | 0.00% |                |
| <i>Ighv1-16</i>   | 0.00%        | 0.00% |                | 0.00% |                | 0.00%         | 0.00% |                |
| <i>Ighv1-15</i>   | 0.64%        | 0.66% |                | 0.89% |                | 1.18%         | 0.81% | *              |
| <i>Ighv1-14</i>   | 0.03%        | 0.16% |                | 0.00% |                | 0.08%         | 0.00% | *              |
| <i>Ighv1-13</i>   | 0.03%        | 0.16% |                | 0.00% |                | 0.04%         | 0.00% |                |
| <i>Ighv1-12</i>   | 0.51%        | 0.00% |                | 0.00% |                | 0.81%         | 0.26% | ****           |
| <i>Ighv1-11</i>   | 1.59%        | 0.66% |                | 0.89% |                | 0.76%         | 0.09% | ****           |
| <i>Ighv1-10</i>   | 0.00%        | 0.00% |                | 0.00% |                | 0.00%         | 0.00% |                |
| <i>Ighv1-9</i>    | 1.68%        | 0.98% |                | 1.79% |                | 2.52%         | 1.29% | ****           |
| <i>Ighv15-2</i>   | 0.76%        | 0.33% |                | 0.00% |                | 0.60%         | 0.16% | ****           |
| <i>Ighv1-8</i>    | 0.00%        | 0.00% |                | 0.00% |                | 0.00%         | 0.00% |                |
| <i>Ighv10-4</i>   | 0.00%        | 0.00% |                | 0.00% |                | 0.00%         | 0.00% |                |
| <i>Ighv1-7</i>    | 1.02%        | 1.48% |                | 0.00% |                | 1.17%         | 1.69% | ***            |
| <i>Ighv1-6</i>    | 0.00%        | 0.00% |                | 0.00% |                | 0.00%         | 0.00% |                |
| <i>Ighv10-3</i>   | 0.95%        | 1.15% |                | 3.57% |                | 1.12%         | 1.42% | *              |
| <i>Ighv1-5</i>    | 1.30%        | 1.48% |                | 2.68% |                | 1.02%         | 1.18% |                |
| <i>Ighv10-2</i>   | 0.00%        | 0.00% |                | 0.00% |                | 0.00%         | 0.00% |                |
| <i>Ighv1-4</i>    | 0.48%        | 0.98% |                | 0.00% |                | 0.58%         | 0.61% |                |
| <i>Ighv1-3</i>    | 0.00%        | 0.00% |                | 0.00% |                | 0.00%         | 0.00% |                |
| <i>Ighv10-1</i>   | 1.65%        | 3.28% | *              | 1.79% |                | 1.08%         | 1.62% | ***            |
| <i>Ighv1-2</i>    | 1.40%        | 1.48% |                | 0.89% |                | 0.76%         | 0.16% | ****           |
| <i>Ighv8-2</i>    | 1.05%        | 1.31% |                | 1.79% |                | 0.44%         | 0.01% | ****           |
| <i>Ighv6-7</i>    | 0.03%        | 0.00% |                | 0.00% |                | 0.03%         | 0.00% |                |
| <i>Ighv6-6</i>    | 0.86%        | 1.31% |                | 1.79% |                | 0.93%         | 1.81% | ****           |
| <i>Ighv6-5</i>    | 0.06%        | 0.33% |                | 0.00% |                | 0.07%         | 0.00% | *              |
| <i>Ighv6-4</i>    | 0.03%        | 0.00% |                | 0.00% |                | 0.01%         | 0.00% |                |
| <i>Ighv6-3</i>    | 1.27%        | 1.97% |                | 2.68% |                | 1.20%         | 3.10% | ****           |
| <i>Ighv12-3</i>   | 0.89%        | 0.33% |                | 0.89% |                | 0.53%         | 0.02% | ****           |
| <i>Ighv13-2</i>   | 1.05%        | 0.49% |                | 1.79% |                | 0.58%         | 0.25% | ****           |
| <i>Ighv8-1</i>    | 0.00%        | 0.00% |                | 0.00% |                | 0.00%         | 0.00% |                |
| <i>Ighv3-8</i>    | 0.83%        | 2.13% | *              | 2.68% |                | 0.68%         | 1.68% | ****           |
| <i>Ighv5-21</i>   | 0.00%        | 0.00% |                | 0.00% |                | 0.02%         | 0.00% |                |
| <i>Ighv3-7</i>    | 0.00%        | 0.00% |                | 0.00% |                | 0.00%         | 0.00% |                |
| <i>Ighv9-4</i>    | 0.79%        | 0.82% |                | 0.00% |                | 0.35%         | 0.36% |                |
| <i>Ighv3-6</i>    | 2.38%        | 4.10% | *              | 4.46% |                | 2.73%         | 5.27% | ****           |
| <i>Ighv13-1</i>   | 0.00%        | 0.00% |                | 0.00% |                | 0.00%         | 0.00% |                |
| <i>Ighv3-5</i>    | 0.25%        | 0.33% |                | 0.00% |                | 0.17%         | 0.17% |                |

Table S4 continued ...

| V genes           | pro-B unique |       |                | spleen unique |                |       |       |                |
|-------------------|--------------|-------|----------------|---------------|----------------|-------|-------|----------------|
|                   | WT           | R972Q | p <sup>1</sup> | F791L         | p <sup>1</sup> | WT    | R972Q | p <sup>1</sup> |
| <i>Ighv3-4</i>    | 0.25%        | 0.16% |                | 0.00%         |                | 0.15% | 0.05% | *              |
| <i>Ighv7-4</i>    | 0.10%        | 0.16% |                | 0.00%         |                | 0.10% | 0.07% |                |
| <i>Ighv3-3</i>    | 0.51%        | 0.00% |                | 0.00%         |                | 0.27% | 0.00% | ****           |
| <i>Ighv14-4</i>   | 0.83%        | 0.16% |                | 0.89%         |                | 1.22% | 0.23% | ****           |
| <i>Ighv15-1</i>   | 0.00%        | 0.00% |                | 0.00%         |                | 0.00% | 0.00% |                |
| <i>Ighv7-3</i>    | 0.70%        | 1.15% |                | 0.00%         |                | 0.70% | 1.53% | ****           |
| <i>Ighv9-3</i>    | 2.29%        | 3.93% | *              | 5.36%         |                | 2.64% | 5.54% | ****           |
| <i>Ighv12-2</i>   | 0.00%        | 0.00% |                | 0.00%         |                | 0.00% | 0.00% |                |
| <i>Ighv9-2</i>    | 0.51%        | 0.82% |                | 0.00%         |                | 0.26% | 0.45% | *              |
| <i>Ighv12-1</i>   | 0.10%        | 0.00% |                | 0.00%         |                | 0.06% | 0.01% | *              |
| <i>Ighv9-1</i>    | 0.38%        | 0.00% |                | 0.89%         |                | 0.53% | 0.81% | *              |
| <i>Ighv6-2</i>    | 0.00%        | 0.00% |                | 0.00%         |                | 0.00% | 0.00% |                |
| <i>Ighv16-1</i>   | 0.00%        | 0.00% |                | 0.00%         |                | 0.00% | 0.00% |                |
| <i>Ighv14-3</i>   | 0.92%        | 1.31% |                | 1.79%         |                | 0.95% | 1.34% | *              |
| <i>Ighv11-2</i>   | 0.44%        | 0.16% |                | 0.00%         |                | 0.35% | 0.03% | ****           |
| <i>Ighv3-2</i>    | 0.54%        | 1.15% |                | 0.89%         |                | 0.57% | 0.03% | ****           |
| <i>Ighv4-2</i>    | 0.60%        | 0.66% |                | 0.00%         |                | 0.36% | 0.02% | ****           |
| <i>Ighv14-2</i>   | 0.60%        | 0.33% |                | 0.00%         |                | 1.20% | 0.67% | ****           |
| <i>Ighv11-1</i>   | 0.38%        | 0.33% |                | 0.00%         |                | 0.13% | 0.00% | ***            |
| <i>Ighv3-1</i>    | 0.32%        | 0.82% |                | 0.00%         |                | 0.42% | 0.49% |                |
| <i>Ighv4-1</i>    | 1.33%        | 0.98% |                | 0.00%         |                | 0.62% | 0.48% |                |
| <i>Ighv14-1</i>   | 0.10%        | 0.00% |                | 0.00%         |                | 0.42% | 0.13% | ****           |
| <i>Ighv7-2</i>    | 0.00%        | 0.00% |                | 0.00%         |                | 0.00% | 0.00% |                |
| <i>Ighv7-1</i>    | 0.98%        | 1.48% |                | 1.79%         |                | 0.60% | 0.61% |                |
| <i>Ighv5-19</i>   | 0.00%        | 0.00% |                | 0.00%         |                | 0.00% | 0.00% |                |
| <i>Ighv2-9</i>    | 0.79%        | 1.31% |                | 0.00%         |                | 0.67% | 0.33% | ***            |
| <i>Ighv2-8</i>    | 0.00%        | 0.00% |                | 0.00%         |                | 0.00% | 0.00% |                |
| <i>Ighv5-18</i>   | 0.00%        | 0.00% |                | 0.00%         |                | 0.00% | 0.00% |                |
| <i>Ighv5-17</i>   | 0.76%        | 0.98% |                | 1.79%         |                | 1.56% | 1.50% |                |
| <i>Ighv5-16</i>   | 0.83%        | 0.98% |                | 3.57%         |                | 0.92% | 1.40% | ***            |
| <i>Ighv5-15</i>   | 0.32%        | 0.66% |                | 0.00%         |                | 0.24% | 0.17% |                |
| <i>Ighv2-7</i>    | 0.00%        | 0.00% |                | 0.00%         |                | 0.00% | 0.00% |                |
| <i>Ighv2-6-8</i>  | 0.00%        | 0.00% |                | 0.00%         |                | 0.00% | 0.00% |                |
| <i>Ighv5-13</i>   | 0.00%        | 0.00% |                | 0.00%         |                | 0.00% | 0.00% |                |
| <i>Ighv2-9-1</i>  | 0.54%        | 1.31% | *              | 0.00%         |                | 0.64% | 1.11% | ****           |
| <i>Ighv5-12-4</i> | 0.00%        | 0.00% |                | 0.00%         |                | 0.00% | 0.00% |                |
| <i>Ighv5-9-1</i>  | 0.51%        | 0.16% |                | 0.00%         |                | 0.45% | 0.28% | *              |
| <i>Ighv2-6</i>    | 0.76%        | 0.82% |                | 0.00%         |                | 0.44% | 0.41% |                |
| <i>Ighv5-12</i>   | 0.95%        | 1.48% |                | 0.89%         |                | 0.48% | 0.22% | ***            |
| <i>Ighv5-11</i>   | 0.00%        | 0.00% |                | 0.00%         |                | 0.00% | 0.00% |                |
| <i>Ighv2-5</i>    | 0.86%        | 0.49% |                | 0.89%         |                | 0.56% | 0.57% |                |
| <i>Ighv5-10</i>   | 0.00%        | 0.00% |                | 0.00%         |                | 0.00% | 0.00% |                |
| <i>Ighv5-9</i>    | 0.35%        | 0.33% |                | 1.79%         |                | 0.24% | 0.56% | ****           |

Table S5: Trb V gene usage (related to figure 7)

| Trb V | Spleen Treg |        |        | Spleen Tconv |        |        | Thymus DN4 |        |       | Thymus DP |        |  |
|-------|-------------|--------|--------|--------------|--------|--------|------------|--------|-------|-----------|--------|--|
|       | WT          | R972Q  | F971L  | WT           | R972Q  | F971L  | WT         | R972Q  | WT    | R972Q     | F791L  |  |
| 01-1  | 5.81%       | 6.52%  | 14.00% | 6.92%        | 6.51%  | 11.20% | 4.81%      | 4.69%  | 4.90% | 4.08%     | 7.91%  |  |
| 02-1  | 6.88%       | 1.93%  | 0.46%  | 6.90%        | 2.08%  | 0.66%  | 5.29%      | 2.34%  | 5.46% | 1.46%     | 0.45%  |  |
| 03-1  | 8.55%       | 3.66%  | 2.19%  | 7.65%        | 3.22%  | 1.75%  | 5.66%      | 0.78%  | 5.99% | 1.22%     | 0.87%  |  |
| 04-1  | 4.83%       | 1.32%  | 2.11%  | 6.01%        | 1.42%  | 1.68%  | 6.69%      | 2.34%  | 7.19% | 1.98%     | 2.56%  |  |
| 05-1  | 7.83%       | 5.78%  | 2.03%  | 7.29%        | 5.45%  | 1.48%  | 6.29%      | 9.38%  | 6.64% | 4.15%     | 1.40%  |  |
| 06-1  | 0.00%       | 0.00%  | 0.00%  | 0.00%        | 0.00%  | 0.01%  | 0.00%      | 0.78%  | 0.00% | 0.00%     | 0.01%  |  |
| 07-1  | 0.00%       | 0.00%  | 0.00%  | 0.00%        | 0.00%  | 0.00%  | 0.00%      | 0.00%  | 0.00% | 0.00%     | 0.00%  |  |
| 08-1  | 0.00%       | 0.00%  | 0.04%  | 0.00%        | 0.00%  | 0.00%  | 0.00%      | 0.00%  | 0.00% | 0.00%     | 0.00%  |  |
| 09-1  | 0.01%       | 0.00%  | 0.00%  | 0.00%        | 0.00%  | 0.00%  | 0.00%      | 0.00%  | 0.00% | 0.00%     | 0.00%  |  |
| 10-1  | 0.06%       | 0.03%  | 0.00%  | 0.08%        | 0.00%  | 0.00%  | 0.09%      | 0.00%  | 0.06% | 0.00%     | 0.00%  |  |
| 11-1  | 0.01%       | 0.00%  | 0.00%  | 0.00%        | 0.00%  | 0.01%  | 0.00%      | 0.78%  | 0.00% | 0.00%     | 0.01%  |  |
| 12-1  | 4.69%       | 3.08%  | 2.40%  | 2.67%        | 0.82%  | 0.53%  | 8.93%      | 1.56%  | 7.92% | 2.05%     | 1.29%  |  |
| 13-1  | 5.08%       | 8.01%  | 9.98%  | 5.85%        | 9.13%  | 13.71% | 5.37%      | 9.38%  | 5.42% | 11.68%    | 16.60% |  |
| 12-2  | 3.07%       | 2.23%  | 1.16%  | 1.72%        | 0.98%  | 0.52%  | 4.88%      | 1.56%  | 4.22% | 1.51%     | 0.89%  |  |
| 13-2  | 11.22%      | 17.03% | 23.15% | 11.98%       | 18.33% | 24.51% | 8.90%      | 13.28% | 8.85% | 19.44%    | 26.25% |  |
| 12-3  | 0.01%       | 0.00%  | 0.04%  | 0.00%        | 0.00%  | 0.01%  | 0.00%      | 0.00%  | 0.00% | 0.00%     | 0.00%  |  |
| 13-3  | 5.61%       | 11.34% | 12.71% | 6.13%        | 12.73% | 15.55% | 4.64%      | 10.94% | 4.38% | 12.30%    | 13.85% |  |
| 14-1  | 1.57%       | 0.20%  | 0.37%  | 1.91%        | 0.40%  | 0.42%  | 2.74%      | 3.13%  | 3.01% | 0.72%     | 1.00%  |  |
| 15-1  | 4.66%       | 1.39%  | 1.28%  | 3.94%        | 1.30%  | 0.94%  | 5.38%      | 7.03%  | 5.40% | 1.24%     | 1.00%  |  |
| 16-1  | 5.43%       | 13.61% | 9.23%  | 5.07%        | 12.46% | 6.67%  | 5.10%      | 11.72% | 5.15% | 12.74%    | 6.03%  |  |
| 17-1  | 1.54%       | 1.92%  | 0.33%  | 1.61%        | 1.81%  | 0.53%  | 2.63%      | 5.47%  | 2.63% | 5.25%     | 1.86%  |  |
| 18-1  | 0.00%       | 0.01%  | 0.04%  | 0.00%        | 0.00%  | 0.01%  | 0.00%      | 0.78%  | 0.00% | 0.00%     | 0.01%  |  |
| 19-1  | 7.70%       | 14.95% | 14.04% | 8.62%        | 16.42% | 14.79% | 6.60%      | 7.03%  | 6.85% | 12.37%    | 12.62% |  |
| 20-1  | 4.14%       | 2.57%  | 2.36%  | 4.26%        | 2.60%  | 2.70%  | 3.61%      | 0.00%  | 3.62% | 2.53%     | 2.57%  |  |
| 21-1  | 0.37%       | 0.01%  | 0.00%  | 0.42%        | 0.00%  | 0.02%  | 0.60%      | 0.00%  | 0.53% | 0.00%     | 0.00%  |  |
| 22-1  | 0.34%       | 0.00%  | 0.00%  | 0.24%        | 0.00%  | 0.00%  | 0.29%      | 0.00%  | 0.26% | 0.00%     | 0.00%  |  |
| 23-1  | 0.93%       | 0.28%  | 0.00%  | 1.01%        | 0.22%  | 0.11%  | 0.94%      | 0.00%  | 0.93% | 0.18%     | 0.06%  |  |
| 24-1  | 3.12%       | 0.08%  | 0.00%  | 2.85%        | 0.11%  | 0.02%  | 3.71%      | 1.56%  | 3.03% | 0.20%     | 0.08%  |  |
| 25-1  | 0.00%       | 0.00%  | 0.04%  | 0.00%        | 0.00%  | 0.00%  | 0.00%      | 0.78%  | 0.00% | 0.00%     | 0.01%  |  |
| 26-1  | 3.95%       | 3.42%  | 1.74%  | 3.74%        | 3.38%  | 1.72%  | 3.66%      | 0.78%  | 3.77% | 3.42%     | 1.73%  |  |
| 27-1  | 0.01%       | 0.08%  | 0.21%  | 0.00%        | 0.02%  | 0.04%  | 0.00%      | 1.56%  | 0.00% | 0.01%     | 0.10%  |  |
| 28-1  | 0.00%       | 0.00%  | 0.00%  | 0.00%        | 0.00%  | 0.00%  | 0.00%      | 0.00%  | 0.00% | 0.00%     | 0.00%  |  |
| 29-1  | 2.23%       | 0.42%  | 0.04%  | 2.98%        | 0.45%  | 0.26%  | 3.00%      | 2.34%  | 3.53% | 1.33%     | 0.74%  |  |
| 30-1  | 0.32%       | 0.13%  | 0.04%  | 0.15%        | 0.16%  | 0.14%  | 0.19%      | 0.00%  | 0.24% | 0.13%     | 0.10%  |  |

Table S6: *Trb J* gene usage<sup>1</sup>(related to figure 7)

| <i>Trb J</i> | DN4    |        |      | DP     |        |       | Spleen Treg |       |        | Spleen TConv |       |        |      |        |        |      |        |       |
|--------------|--------|--------|------|--------|--------|-------|-------------|-------|--------|--------------|-------|--------|------|--------|--------|------|--------|-------|
|              | WT     | R972Q  | *    | WT     | R972Q  | F971L | WT          | R972Q | F971L  | WT           | R972Q | F971L  | WT   | R972Q  | F791L  |      |        |       |
|              |        |        |      |        |        |       |             |       |        |              |       |        |      |        |        | WT   | R972Q  | F971L |
| 1-01         | 10.55% | 3.91%  | *    | 10.36% | 1.56%  | ****  | 2.03%       | ****  | 8.46%  | 0.68%        | ****  | 1.11%  | **** | 4.27%  | 0.67%  | **** | 0.89%  | ****  |
| 1-02         | 6.80%  | 0.78%  | *    | 7.01%  | 0.17%  | ****  | 0.31%       | ****  | 5.59%  | 0.05%        | ****  | 0.05%  | **** | 7.12%  | 0.09%  | **** | 0.09%  | ****  |
| 1-03         | 6.08%  | 1.56%  | *    | 6.22%  | 0.30%  | ****  | 0.23%       | ****  | 6.01%  | 0.16%        | ****  | 0.05%  | **** | 6.91%  | 0.20%  | **** | 0.12%  | ****  |
| 1-04         | 8.22%  | 0.00%  | *    | 8.56%  | 0.10%  | ****  | 0.18%       | ****  | 7.12%  | 0.11%        | ****  | 0.18%  | **** | 8.49%  | 0.07%  | **** | 0.14%  | ****  |
| 1-05         | 3.82%  | 0.00%  | *    | 4.07%  | 0.12%  | ****  | 0.22%       | ****  | 3.14%  | 0.05%        | ****  | 0.09%  | **** | 4.00%  | 0.07%  | **** | 0.10%  | ****  |
| 1-06         | 4.17%  | 4.69%  |      | 4.29%  | 3.28%  | ****  | 6.62%       | ****  | 2.97%  | 5.42%        | ****  | 11.33% | **** | 2.87%  | 4.30%  | **** | 8.56%  |       |
| 1-07         | 0.04%  | 0.00%  |      | 0.04%  | 0.01%  | ****  | 0.01%       | ****  | 0.02%  | 0.00%        |       | 0.00%  |      | 0.02%  | 0.00%  |      | 0.01%  |       |
| 2-01         | 9.71%  | 2.34%  | *    | 9.95%  | 4.75%  | ****  | 7.29%       | ****  | 9.96%  | 4.01%        | ****  | 5.73%  | **** | 10.01% | 4.34%  | **** | 6.05%  | ****  |
| 2-02         | 5.86%  | 4.69%  |      | 6.14%  | 0.37%  | ****  | 0.68%       | ****  | 6.40%  | 0.48%        | ****  | 0.82%  | **** | 6.77%  | 0.49%  | *    | 0.93%  | ****  |
| 2-03         | 8.88%  | 3.13%  | *    | 9.14%  | 2.97%  | ****  | 1.48%       | ****  | 8.07%  | 1.85%        | ****  | 1.63%  | **** | 8.98%  | 2.33%  | **** | 1.55%  | ****  |
| 2-04         | 7.97%  | 4.69%  |      | 8.10%  | 3.86%  | ****  | 2.70%       | ****  | 9.35%  | 4.88%        | ****  | 3.77%  | **** | 8.15%  | 4.36%  | **** | 3.12%  | ****  |
| 2-05         | 10.67% | 15.63% |      | 11.35% | 14.54% | ****  | 6.52%       | ****  | 12.48% | 15.80%       | ****  | 7.12%  | **** | 12.50% | 15.53% | **** | 7.34%  | ****  |
| 2-06         | 0.03%  | 0.00%  |      | 0.03%  | 0.01%  | **    | 0.02%       |       | 0.02%  | 0.00%        |       | 0.00%  |      | 0.02%  | 0.00%  |      | 0.02%  |       |
| 2-07         | 17.07% | 58.59% | **** | 14.66% | 67.58% | ****  | 71.70%      | ****  | 20.40% | 66.49%       | ****  | 68.13% | **** | 19.90% | 67.55% | **** | 71.08% | ****  |

<sup>1</sup> P value calculated with Chi square test. \* P<0.05, \*\* P<0.01, \*\*\* P<0.001, \*\*\*\* P<0.0001



Table S7: Igh V gene Coding end comparison in pro-B cells (related to discussion)

|                      |                   |  |                      |                   |
|----------------------|-------------------|--|----------------------|-------------------|
| <b>R972Q &gt;WT</b>  | <b>Coding end</b> |  | <b>F971L &gt;WT</b>  | <b>Coding end</b> |
| <i>Ighv1-19</i>      | ga                |  | <i>Ighv1-19</i>      | ga                |
| <i>Ighv1-72</i>      | ga                |  | <i>Ighv1-18</i>      | ga                |
| <i>Ighv3-6</i>       | ga                |  | <i>Ighv3-6</i>       | ga                |
| <i>Ighv9-3</i>       | ga                |  | <i>Ighv9-3</i>       | ga                |
| <i>Ighv10-1</i>      | ca                |  | <i>Ighv5-16</i>      | ga                |
| <i>Ighv3-8</i>       | ta                |  | <i>Ighv3-8</i>       | ta                |
| <i>Ighv1-26</i>      | ga                |  | <i>Ighv10-3</i>      | ga                |
| <i>Ighv8-8</i>       | ag                |  | <i>Ighv1-22</i>      | ga                |
| <i>Ighv2-9-1</i>     | aa                |  | <i>Ighv5-9</i>       | ca                |
| <i>Ighv1-80</i>      | ga                |  | <i>Ighv1-80</i>      | ga                |
|                      |                   |  |                      |                   |
| <b>WT &gt; R972Q</b> | <b>Coding end</b> |  | <b>WT &gt; F971L</b> | <b>Coding end</b> |
| <i>Ighv14-4</i>      | ca                |  | <i>Ighv1-7</i>       | ga                |
| <i>Ighv8-12</i>      | ag                |  | <i>Ighv2-3</i>       | cc                |
| <i>Ighv1-9</i>       | ga                |  | <i>Ighv1-76</i>      | ga                |
| <i>Ighv1-64</i>      | ga                |  | <i>Ighv4-1</i>       | ca                |
| <i>Ighv1-11</i>      | gg                |  | <i>Ighv1-53</i>      | ga                |
| <i>Ighv1-55</i>      | ga                |  | <i>Ighv5-6</i>       | ca                |
| <i>Ighv2-3</i>       | cc                |  | <i>Ighv1-55</i>      | ga                |
| <i>Ighv5-4</i>       | ga                |  | <i>Ighv5-4</i>       | ga                |
| <i>Ighv2-2</i>       | aa                |  | <i>Ighv1-26</i>      | ga                |
| <i>Ighv5-2</i>       | ca                |  | <i>Ighv5-2</i>       | ca                |
|                      |                   |  |                      |                   |
| <b>WT = R972Q</b>    | <b>Coding end</b> |  | <b>WT = F971L</b>    | <b>Coding end</b> |
| <i>Ighv1-18</i>      | ga                |  | <i>Ighv1-69</i>      | ga                |
| <i>Ighv1-82</i>      | ga                |  | <i>Ighv14-4</i>      | ca                |
| <i>Ighv5-6</i>       | ca                |  | <i>Ighv2-5</i>       | aa                |
| <i>Ighv1-2</i>       | ga                |  | <i>Ighv12-3</i>      | ga                |
| <i>Ighv1-76</i>      | ga                |  | <i>Ighv1-74</i>      | ta                |
| <i>Ighv1-22</i>      | ga                |  | <i>Ighv5-12</i>      | ca                |
| <i>Ighv1-69</i>      | ga                |  | <i>Ighv1-67</i>      | ga                |
| <i>Ighv9-4</i>       | ga                |  | <i>Ighv1-78</i>      | ga                |
| <i>Ighv2-6</i>       | ga                |  | <i>Ighv1-72</i>      | ga                |
| <i>Ighv1-50</i>      | ga                |  | <i>Ighv8-12</i>      | ag                |

Table S8: Trb V gene coding end comparison in DP cells (related to discussion)

|                      |                   |  |                      |                   |
|----------------------|-------------------|--|----------------------|-------------------|
| <b>R972Q &gt;WT</b>  | <b>Coding end</b> |  | <b>F971L &gt;WT</b>  | <b>Coding End</b> |
| <i>TCRBV13-02</i>    | tg                |  | <i>TCRBV13-02</i>    | tg                |
| <i>TCRBV13-03</i>    | tg                |  | <i>TCRBV13-01</i>    | tg                |
| <i>TCRBV16-01</i>    | ga                |  | <i>TCRBV13-03</i>    | tg                |
| <i>TCRBV13-01</i>    | tg                |  | <i>TCRBV19-01</i>    | ag                |
| <i>TCRBV19-01</i>    | ag                |  | <i>TCRBV01-01</i>    | ga                |
| <i>TCRBV17-01</i>    | ga                |  | <i>TCRBV16-01</i>    | ga                |
|                      |                   |  |                      |                   |
| <b>WT &gt; R972Q</b> | <b>Coding end</b> |  | <b>WT &gt; F971L</b> | <b>Coding end</b> |
| <i>TCRBV12-02</i>    | tc                |  | <i>TCRBV14-01</i>    | tc                |
| <i>TCRBV24-01</i>    | ta                |  | <i>TCRBV26-01</i>    | tc                |
| <i>TCRBV05-01</i>    | ga                |  | <i>TCRBV29-01</i>    | tc                |
| <i>TCRBV02-01</i>    | ga                |  | <i>TCRBV24-01</i>    | ta                |
| <i>TCRBV15-01</i>    | gc                |  | <i>TCRBV12-02</i>    | tc                |
| <i>TCRBV03-01</i>    | gc                |  | <i>TCRBV15-01</i>    | gc                |
| <i>TCRBV04-01</i>    | ga                |  | <i>TCRBV04-01</i>    | ga                |
| <i>TCRBV12-01</i>    | tc                |  | <i>TCRBV02-01</i>    | ga                |
|                      |                   |  |                      |                   |
| <b>WT = R972Q</b>    | <b>Coding end</b> |  | <b>WT = F971L</b>    | <b>Coding end</b> |
| <i>TCRBV30-01</i>    | ga                |  | <i>TCRBV30-01</i>    | ga                |
| <i>TCRBV22-01</i>    | tc                |  | <i>TCRBV22-01</i>    | tc                |
| <i>TCRBV26-01</i>    | tc                |  | <i>TCRBV21-01</i>    | tc                |
| <i>TCRBV21-01</i>    | tc                |  | <i>TCRBV17-01</i>    | ga                |
| <i>TCRBV23-01</i>    | tc                |  | <i>TCRBV23-01</i>    | tc                |
| <i>TCRBV01-01</i>    | ga                |  | <i>TCRBV20-01</i>    | tg                |

## Supplementary Methods

### Mice

A guide RNA (gRNA) was designed to target nucleotides 2919 and 2920 of the mouse *Rag1* gene (CCDS16463.1), in a region within the C-terminus domain (CTD).

To introduce the desired mutations into the mouse *Rag1* locus, three single-stranded 160 bp DNA oligonucleotide (ssODN) donor templates (ordered from Integrated DNA Technologies, Coralville, IA) were used, that were highly homologous to the area flanking the cutting site, and containing the following protospacer regions, each containing the desired point mutation (underlined):

ACAAGCTGTTTAGAAGGTTTCAG (R972Q, or c.2915G>A)

ACAAGCTGTTTAGAAGGCTTCGG (F971L, or c. 2911T>C),)

ACAAGCTGTTTAGAAGGTTTIGG (R972W, or c.2914C>T).

In addition to the desired mutation, all ssODNs contained a silent mutation at c. 2908 C>A to prevent additional cutting after the sequence of the ssODN has been incorporated into the targeted mouse genome.

100ng/ul of Cas9 mRNA (purchased from System Biosciences, Palo Alto, CA), 50ng/ul of gRNA (generated from PCR product using Megashortscript T7 kit, Life Technologies, Washington D.C.), and 150 ng/μl of a mixture with equal amounts of the three ssODNs were injected in 200 zygotes of C57BL/6 mice. Embryos were placed back into six recipient C57BL/6 mice, as reported previously<sup>1</sup>. F0 genotypes were analyzed using Sanger sequencing. F0 mice were bred with wt C57BL/6 mice to get heterozygous F1 mice, which were bred to obtain homozygous F2 mice. All mouse experiments were done with F2 or later generations. *Rag1*<sup>-/-</sup> control mice and the *Foxp3*EGFPCre mice<sup>2</sup> were purchased from the Jackson Laboratory (Bar Harbor, ME). *Foxp3*EGFPCre mice were crossed with homozygous F2 mutants. Wild-type control mice were derived from wild-type F2 littermates. All mice described in this manuscript were on a C57BL/6 background. Offspring of different founders were compared to rule out any effects of offsite targeting. Animal work was conducted adhering to the institution's guidelines for animal use, and followed the guidelines and basic principles in the United States Public Health Service Policy on Humane Care and Use of Laboratory Animals, and the Guide for the Care and Use of Laboratory Animals by certified staff in an Association for Assessment and Accreditation of Laboratory Animal Care (AAALAC) International accredited facility.

### Cell isolation

Thymic DP (CD4<sup>+</sup> CD8<sup>+</sup>) and DN4 (CD4<sup>-</sup> CD8<sup>-</sup> CD44<sup>-</sup> CD25<sup>-</sup>) cells, splenic Treg cells (CD4<sup>+</sup> EGFP<sup>+</sup>) and Tconv cells (CD4<sup>+</sup> EGFP<sup>-</sup>), bone marrow pro-B (B220<sup>low</sup> IgM<sup>-</sup> B220<sup>lo</sup> IgM<sup>-</sup> CD43<sup>+</sup>) and pre-B (B220<sup>low</sup>

IgM<sup>B220</sup><sup>lo</sup>IgM<sup>-</sup>CD43<sup>-</sup>) and peritoneal B1 (CD19<sup>+</sup>CD11b<sup>+</sup>), B2 (CD19<sup>+</sup>CD11b<sup>-</sup>) and B1a (CD19<sup>+</sup>CD11b<sup>+</sup>CD5<sup>+</sup>) and B1b (CD19<sup>+</sup>CD11b<sup>+</sup>CD5<sup>-</sup>) cells were isolated on FACS Aria II (BD). Mature splenic IgM<sup>+</sup> B cells were purified using Miltenyi MACS bead purification.

### **Flow cytometry antibodies**

Lymphocyte subsets were analyzed by flow cytometry using the BD LSRFortessa™ (BD Biosciences, San Jose, CA) with DIVA software, and Flowjo™. The following antibodies were used: CD3-PerCP-Cy5.5 Clone 145-2c11 (BD Biosciences), CD4-PB clone RM 4-5 (eBioscience, San Diego, CA), CD8-APC-Cy7 Clone 53-6.7 (Biolegend, San Diego, CA), CD44-PE-Cy7 clone IM7 (Biolegend), CD25-PerCP-Cy5.5 and PE Clone PC61 (BD), CD44-FITC clone IM7 (BD Biosciences), CD62L-PE clone MEL-14 (Biolegend), B220-PB Clone RA3-6B2 (eBioscience), CD117-PE-Cy7 clone 2B8 (Biolegend), CD19-PB clone eBio1D3 (eBioscience), IgM-PerCP-Cy5.5 and BV605 (eBioscience), CD43- PE and FITC clone eBioR2/60 (eBioscience), CD93-PE-Cy7 clone AA4.1 (eBioscience), CD21-FITC clone 7G6 (BD), CD23-PE clone B3B5 (eBioscience), lambda-PE clone RML-42 (Biolegend), γδ TCR -FITC clone GL3 (Biolegend), β TCR-PE-Cy7 clone H57-597 (eBioscience). For thymus staining, a lineage negative stain was used to exclude cells that were not thymocytes: B220-APC clone RA3-6B2 (Biolegend), CD11b-APC clone M1/70 (Biolegend), Ter119-APC clone TER119 (Biolegend). Annexin V eBioscience kit was used with Annexin V-APC and PI. For staining of peritoneal B cells, the following antibodies were used: B220 APC-Cy7 clone C363-16A (Biolegend), CD5-APC clone 53-7.3 (Biolegend), CD3e Alexa Fluor 700 clone 500A2 (BD Pharmingen), CD11b PE clone M1/70 (BD Pharmingen), CD19 PerCP-Cy5.5 clone eBio1D3 (eBioscience). For staining of age-associated B cells (ABCs), the following antibodies were used: CD19 FITC (clone eBio1D3, eBioscience), CD11c (clone HL3, BD Pharmingen), 7-AAD as a vitality dye, IgG1k Isotype control eFluor 660 (clone: P3.6.2.8.1, eBioscience) and T-bet eFluor 660 (clone 4B10, eBioscience). Protocol B (One-step protocol: intracellular (nuclear) proteins) of Thermofischer scientific was followed.

### **Immunoglobulin levels in naïve mice**

Total IgG, IgM, and IgE immunoglobulin levels in serum of naïve mice were measured using ELISA as previously described<sup>3</sup>. Briefly, plates were coated overnight using the following antibodies: anti-mouse IgM (Southern Biotech, Birmingham, AL), anti-mouse IgG (Southern Biotech, Birmingham, AL), anti-mouse IgE (BD). Plates were blocked with 1-3% BSA for 2h and serum dilutions were incubated overnight. For IgG detection, an IgG specific antibody conjugated to HRP was used (BD Biosciences). Rag2-deficient serum was used as a negative blank control. For IgM, an alkaline phosphatase-conjugated antibody was used (BD). For IgE determination, a biotinylated anti-IgE (BD Biosciences) primary antibody was used, followed by streptavidin-HRP. OD was measured at 405 nm

and 450 nm for AP- and HRP-mediated reactions, respectively, using an ELISA reader (BioTek Instruments, Winooski, VT). A standard curve was included and exact concentrations could be determined.

### **Immunizations with TNP-Ficoll, TNP-KLH and pneumococcal WCA**

To elicit a T-independent antibody response, 8-12 week old mutant mice and wild type mice were injected with 50 µg TNP(23)Ficoll (Biosearch Technologies, Petaluma, CA). TNP-specific IgM and IgG3 serum levels were determined by ELISA prior to immunization (d0) and 14 days post immunization (d14). IgM and IgG3 levels were measured by ELISA using goat anti-mouse antibody conjugated to AP specific for IgM and IgG3 followed by reaction with *p*-Nitrophenyl Phosphate, Disodium Salt (PNPP) and stopped by 3 N NaOH, and reading of OD at 405 nm. To elicit a T-dependent antibody response, 8-12 week old mice received a primary immunization with 100 µg TNP(18)KLH (Biosearch Technologies) mixed with aluminum adjuvant (volume ratio 2:1) and a booster immunization at d14 with 50 µg TNP(18)KLH with aluminum adjuvant. TNP-specific high affinity IgG was determined prior to immunization, at d14 (prior to booster) and at day 21 (d21) by coating the ELISA plate with TNP(5)BSA (Biosearch Technologies). To measure IgG levels, HRP-conjugated goat anti-mouse IgG (Sigma Aldrich) was used, followed by reaction with TMB that was stopped by sulfuric acid, and OD was read at 450 nm. For both TNP-Ficoll and TNP-KLH ELISAs five-fold serum dilutions were used: 1:100, 1:500, 1:2500, 1: 12500, 1:62500, 1:312000, 1:1562500.

To elicit a Th17 response, 8-12 week old mutant and wild type mice were immunized with 100 µg Pneumococcal whole cell antigen (WCA, a gift of Dr. Richard Malley, Boston Children's Hospital) in the presence of aluminum adjuvant at d0, followed by a booster immunization at d14 with 50 µg WCA without aluminum adjuvant. Antigen specific IgG was determined by coating the 96-well plate with WCA and determining specific IgG at d0, d14 and d21 with HRP-conjugated goat anti-mouse IgG (Sigma Aldrich, Saint Louis, MO), followed by reaction with TMB that was stopped by sulfuric acid, and reading of OD at 450 nm. Serum dilutions at 1:150, 1:450 and 1:1350 were used<sup>4</sup>.

### **Autoantibody microarray**

Protein arrays were used to screen for a broad panel of IgM autoantibodies (University of Texas Southwestern Medical Center, Genomic and Microarray Core Facility) as previously described<sup>5</sup>. Serum from naïve 8-12 week old mice was used. Values were normalized using positive IgM controls for each sample, generating a normalization factor. Each signal was multiplied by this factor. Values from negative control samples (wild-type mice) for each antigen were averaged and ratios were calculated between each sample and the average of negative controls plus 2SD. A heat map of these

ratios was generated using Multi experiment viewer software (MeV, DFCI Boston, MA). Significant differences were assessed using the significance analysis of microarray (SAM, Stanford University Labs) with a false discovery rate <1.

### **Anti-cytokine autoantibody microarray**

RayBio® mouse protein array G2 (Cat # PAM-G2, RayBiotech) was used to screen for cytokine autoantibodies (IgG) in mouse sera diluted 1:200. Protein array screening was performed in the recommended buffers according to the manufacturer's protocol. Arrays were scanned using a microarray scanner (LuxScan HT24, BioCapital). GenePix pro microarray software (v5.1) was used for alignment and data acquisition. Results were quantile normalized to account for interplate variability<sup>6</sup>.

### **Next generation sequencing of *Trb***

T cell receptor  $\beta$  (*Trb*) high throughput sequencing was performed by Adaptive Biotechnologies (Seattle, WA). The DNA was extracted from FACS-sorted lymphocyte populations. Multiplex Polymerase chain reaction (PCR), containing a mixture of all *V* and *J* gene primers, was used to amplify the rearranged CDR3 $\beta$ <sup>7</sup>. PCR products were sequenced using the Illumina HiSeq platform (Illumina, San Diego, CA). The sequences were aligned to a reference genome, and *Trb* *VDJ* gene definitions were based on the international ImMunoGeneTics (IMGT) system<sup>8</sup>. A complete, synthetic repertoire of TCRs was previously used to establish an amplification baseline and to correct for any amplification bias. Data deposited at: <https://doi.org/10.21417/B7MP7Q>, with username: OttdeBruin-review@adaptivebiotech.com and password: ottdebruin2017review.

### **Next generation sequencing of *Igh* rearrangements**

The *Igh* locus of pre-B cells (B220<sup>lo</sup>IgM<sup>+</sup>CD43<sup>-</sup>) and peritoneal B1 cells (CD19<sup>+</sup>CD11b<sup>+</sup>), peritoneal B2 (CD19<sup>+</sup>CD11b<sup>-</sup>) cells, peritoneal B1a (CD19<sup>+</sup>CD11b<sup>+</sup>CD5<sup>+</sup>) and peritoneal B1b (CD19<sup>+</sup>CD11b<sup>+</sup>CD5<sup>-</sup>) cells was sequenced by Adaptive Biotechnologies using a similar technique as for the *Trb* sequencing. However, with the technology of Adaptive Biotechnologies partial rearrangements (*DJ*) would not be picked up. Therefore, we sought a different in depth technology that would be able to show these partial products. This is particularly important at the pro-B cell stage where *D*-to-*J* and *V*-to-*DJ* rearrangements take place. The *Igh* locus of pro-B cells was therefore sequenced using high-throughput genome-wide translocation sequencing-adapted repertoire sequencing (HTGTS-Rep-seq) as described<sup>9,10</sup>. With this translocation-based sequencing technique, different *J* bait primers are used, so any sequence containing a *J* sequence can be analyzed, including *DJ* rearrangements that do

not contain a V gene sequence. Adaptive data deposited at: <https://doi.org/10.21417/B7MP7Q>, with username: [OttdeBruin-review@adaptivebiotech.com](mailto:OttdeBruin-review@adaptivebiotech.com) and password: ottdebruin2017review. HTGTS-Rep-seq data deposited at: <http://www.ncbi.nlm.nih.gov/bioproject/421212>

### PCR amplification of V $\kappa$ -J $\kappa$ rearrangements

V $\kappa$ -to-J $\kappa$  rearrangement PCRs were performed as previously described<sup>11</sup> in pre-B cells (B220<sup>lo</sup>IgM<sup>-</sup>CD43<sup>-</sup>) of wild-type and R972Q mutant mice. Primers flanking exon 6 of the *Dlg5* gene were used as a loading control under the same conditions. PCR products were gel electrophoresed and transferred to determine VJ recombination by Southern blotting.

### Treg suppression assay

CD4<sup>+</sup> T cells were isolated with a CD4 negative isolation kit (Miltenyi). The FACS Aria II was used to separate Treg cells (CD4<sup>+</sup>EGFP<sup>+</sup>) and use these as suppressor cells. The remaining CD4<sup>+</sup>EGFP<sup>-</sup> cells were labeled with CellTrace Violet Cell Proliferation dye according to the manufacturer's instructions (Life Technologies) and used as responder cells. *Rag1*<sup>-/-</sup> spleen cells were used as feeder cells as previously described<sup>12</sup> with a 1:4 ratio of responder to feeder cells. Different ratios of suppressor to responder cells were used in serial dilutions (1:1, 1:2, 1:4, 1:8 and no suppressors). 15,000-45,000 responder cells/well were used. Cells were stimulated for 4-5 d with 2  $\mu$ g/ml of soluble anti-CD3 and cultured in 96-wells, in round-bottomed plates in triplicate. The percentage of divided cells was determined by flow cytometry and the average of the three values was plotted.

### References

1. Ott de Bruin L, Yang W, Capuder K, et al. Rapid generation of novel models of RAG1 deficiency by CRISPR/Cas9-induced mutagenesis in murine zygotes. *Oncotarget*. 2016;7(11):12962-12974.
2. Zhou X, Jeker LT, Fife BT, et al. Selective miRNA disruption in T reg cells leads to uncontrolled autoimmunity. *J Exp Med*. 2008;205(9):1983-1991.
3. Walter JE, Rucci F, Patrizi L, et al. Expansion of immunoglobulin-secreting cells and defects in B cell tolerance in Rag-dependent immunodeficiency. *J Exp Med*. 2010;207(7):1541-1554.
4. Moffitt KL, Gierahn TM, Lu YJ, et al. T(H)17-based vaccine design for prevention of *Streptococcus pneumoniae* colonization. *Cell Host Microbe*. 2011;9(2):158-165.
5. Volpi S, Santori E, Abernethy K, et al. N-WASP is required for B-cell-mediated autoimmunity in Wiskott-Aldrich syndrome. *Blood*. 2016;127(2):216-220.

6. Bolstad BM, Irizarry RA, Astrand M, Speed TP. A comparison of normalization methods for high density oligonucleotide array data based on variance and bias. *Bioinformatics*. 2003;19(2):185-193.
7. Robins HS, Campregher PV, Srivastava SK, et al. Comprehensive assessment of T-cell receptor beta-chain diversity in alphabeta T cells. *Blood*. 2009;114(19):4099-4107.
8. Alamyar E, Duroux P, Lefranc MP, Giudicelli V. IMGT((R)) tools for the nucleotide analysis of immunoglobulin (IG) and T cell receptor (TR) V-(D)-J repertoires, polymorphisms, and IG mutations: IMGT/V-QUEST and IMGT/HighV-QUEST for NGS. *Methods Mol Biol*. 2012;882:569-604.
9. Lin SG, Ba Z, Du Z, Zhang Y, Hu J, Alt FW. Highly sensitive and unbiased approach for elucidating antibody repertoires. *Proc Natl Acad Sci U S A*. 2016;113(28):7846-7851.
10. Hu J, Meyers RM, Dong J, Panchakshari RA, Alt FW, Frock RL. Detecting DNA double-stranded breaks in mammalian genomes by linear amplification-mediated high-throughput genome-wide translocation sequencing. *Nat Protoc*. 2016;11(5):853-871.
11. Guo C, Yoon HS, Franklin A, et al. CTCF-binding elements mediate control of V(D)J recombination. *Nature*. 2011;477(7365):424-430.
12. Charbonnier LM, Wang S, Georgiev P, Sefik E, Chatila TA. Control of peripheral tolerance by regulatory T cell-intrinsic Notch signaling. *Nat Immunol*. 2015;16(11):1162-1173.
